# Supplementary material for: Effectiveness and Safety of Under or Over-dosing of Direct Oral Anticoagulants in Atrial Fibrillation: A Systematic Review and Meta-analysis of 148909 Patients From 10 Real-World Studies
Source: PubMed Central journal article supplement (PMC8012667; doi:10.3389/fphar.2021.645479), 2021-03-18
Supplement: datasheet1.pdf [file datasheet1.pdf]

# SUPPLEMENTAL FILE

**Title:** Effectiveness and safety of off-label doses of direct oral anticoagulants in atrial fibrillation: Insights from the pooled-analysis of 148909 patients from 10 real-world studies

## Contents

**eTable 1. Search strategy to identify studies reporting DOACs under- or over-doses**

| Literature databases  | Search items                                                                                                                                                                                                                                                                                                                                                                                                                                                                                                                                                                                                                                                                                                                                                                                                                | Items found |
|-----------------------|-----------------------------------------------------------------------------------------------------------------------------------------------------------------------------------------------------------------------------------------------------------------------------------------------------------------------------------------------------------------------------------------------------------------------------------------------------------------------------------------------------------------------------------------------------------------------------------------------------------------------------------------------------------------------------------------------------------------------------------------------------------------------------------------------------------------------------|-------------|
| MEDLINE via<br>PUBMED | #1<br>“dabigatran”[MeSH Terms] OR “dabigatran”[Title/Abstract] OR “Pradaxa”[Title/Abstract] OR “rivaroxaban”[MeSH Terms] OR “rivaroxaban”[Title/Abstract] OR “Xarelto”[Title/Abstract] OR “apixaban” [MeSH Terms] OR “apixaban”[Title/Abstract] OR “Eliquis”[Title/Abstract] OR “edoxaban”[MeSH Terms] OR “edoxaban”[Title/Abstract] OR “Savaysa”[Title/Abstract]) OR “betrixaban”[MeSH Terms] OR “betrixaban”[Title/Abstract] OR “Bevyxxa”[Title/Abstract]) OR “Non-vitamin K antagonist oral anticoagulants”[Title/Abstract] OR “NOACs”[Title/Abstract]) OR “direct oral anticoagulants”[Title/Abstract]) OR “DOACs”[Title/Abstract]) OR “novel oral anticoagulants”[Title/Abstract]) OR “new oral anticoagulants”[Title/Abstract]) OR “factor Xa inhibitors”[Title/Abstract]) OR “factor IIa inhibitors”[Title/Abstract] | 1017        |

|          |                                                                                                                                                                                                                                                                                                                                                                                                                                                                                                                                                                                                                                                                                                                                                                                                                                                                                                                                                                                                                                                 |      |
|----------|-------------------------------------------------------------------------------------------------------------------------------------------------------------------------------------------------------------------------------------------------------------------------------------------------------------------------------------------------------------------------------------------------------------------------------------------------------------------------------------------------------------------------------------------------------------------------------------------------------------------------------------------------------------------------------------------------------------------------------------------------------------------------------------------------------------------------------------------------------------------------------------------------------------------------------------------------------------------------------------------------------------------------------------------------|------|
|          | <p>#2</p> <p>“label”[Title/Abstract] OR “off-label” [Title/Abstract] OR “on-label” [Title/Abstract] OR “underdosing” [Title/Abstract] OR “underdose”[Title/Abstract] OR “underdosed”[Title/Abstract] OR “overdosing”[Title/Abstract] OR “overdose”[Title/Abstract] OR “overdosed”[Title/Abstract] OR “reduced dose” [Title/Abstract] OR “low dose”[Title/Abstract] OR “prescribing patterns”[Title/Abstract] OR “dosing patterns”[Title/Abstract]</p> <p>#1 AND #2</p>                                                                                                                                                                                                                                                                                                                                                                                                                                                                                                                                                                          |      |
| EMBASE   | <p>#1</p> <p>‘dabigatran’/exp OR ‘dabigatran’:ti,ab,kw OR ‘Pradaxa’: ti,ab,kw OR ‘rivaroxaban’/exp OR ‘rivaroxaban’: ti,ab,kw OR ‘Xarelto’: ti,ab,kw OR ‘apixaban’/exp OR ‘apixaban’: ti,ab,kw OR ‘Eliquis’: ti,ab,kw OR edoxaban’/exp OR ‘edoxaban’: ti,ab,kw OR ‘Savaysa’: ti,ab,kw OR ‘betrixaban’/exp OR ‘betrixaban’: ti,ab,kw OR ‘Bevyxxa’: ti,ab,kw OR ‘Non-vitamin K antagonist oral anticoagulants’: ti,ab,kw OR ‘NOACs’: ti,ab,kw OR ‘direct oral anticoagulants’: ti,ab,kw OR ‘DOACs’: ti,ab,kw OR ‘novel oral anticoagulants’: ti,ab,kw OR ‘new oral anticoagulants’: ti,ab,kw OR ‘factor Xa inhibitors’: ti,ab,kw OR ‘factor IIa inhibitors’: ti,ab,kw</p> <p>#2</p> <p>‘label’:ti,ab,kw OR ‘off-label’:ti,ab,kw OR ‘on-label’:ti,ab,kw OR ‘underdosing’:ti,ab,kw OR ‘underdose’:ti,ab,kw OR ‘underdosed’:ti,ab,kw OR ‘overdosing’:ti,ab,kw OR ‘overdose’:ti,ab,kw OR ‘overdosed’:ti,ab,kw OR ‘reduced dose’:ti,ab,kw OR ‘low dose’:ti,ab,kw OR ‘prescribing patterns’:ti,ab,kw OR ‘dosing patterns’:ti,ab,kw</p> <p>#1 AND #2</p> | 1127 |
| COCHRANE | <p>#1</p>                                                                                                                                                                                                                                                                                                                                                                                                                                                                                                                                                                                                                                                                                                                                                                                                                                                                                                                                                                                                                                       | 193  |

|             |                                                                                                                                                                                                                                                                                                                                                                                                                                                                                                                                                                                                                                                                                                                                                                                                                                                                                                                                                                                                                                           |      |
|-------------|-------------------------------------------------------------------------------------------------------------------------------------------------------------------------------------------------------------------------------------------------------------------------------------------------------------------------------------------------------------------------------------------------------------------------------------------------------------------------------------------------------------------------------------------------------------------------------------------------------------------------------------------------------------------------------------------------------------------------------------------------------------------------------------------------------------------------------------------------------------------------------------------------------------------------------------------------------------------------------------------------------------------------------------------|------|
|             | <p>MeSH descriptor: [dabigatran] OR dabigatran: ti,ab,kw OR Pradaxa: ti,ab,kw OR MeSH descriptor: [rivaroxaban] OR rivaroxaban: ti,ab,kw OR Xarelto: ti,ab,kw OR MeSH descriptor: [apixaban] OR apixaban: ti,ab,kw OR Eliquis: ti,ab,kw OR MeSH descriptor: [edoxaban] OR edoxaban: ti,ab,kw OR Savaysa: ti,ab,kw OR MeSH descriptor: [betrixaban] OR betrixaban: ti,ab,kw OR Bevyxxa: ti,ab,kw OR Non-vitamin K antagonist oral anticoagulants: ti,ab,kw OR NOACs: ti,ab,kw OR direct oral anticoagulants: ti,ab,kw OR DOACs: ti,ab,kw OR novel oral anticoagulants: ti,ab,kw OR new oral anticoagulants: ti,ab,kw OR factor Xa inhibitors: ti,ab,kw OR factor IIa inhibitors: ti,ab,kw</p> <p>#2</p> <p>label:ti,ab,kw OR off-label:ti,ab,kw OR on-label:ti,ab,kw OR underdosing:ti,ab,kw OR underdose:ti,ab,kw OR underdosed:ti,ab,kw OR overdosing:ti,ab,kw OR overdose:ti,ab,kw OR overdosed:ti,ab,kw OR reduced dose:ti,ab,kw OR low dose:ti,ab,kw OR prescribing patterns:ti,ab,kw OR dosingpatterns:ti,ab,kw</p> <p>#1 AND #2</p> |      |
| Overall     |                                                                                                                                                                                                                                                                                                                                                                                                                                                                                                                                                                                                                                                                                                                                                                                                                                                                                                                                                                                                                                           | 2337 |
| Duplication |                                                                                                                                                                                                                                                                                                                                                                                                                                                                                                                                                                                                                                                                                                                                                                                                                                                                                                                                                                                                                                           | 279  |

**eTable 2. Quality assessment scale**

| <b>Bias type</b>                   | <b>Selection<br/>(sample population)</b>                                                                                                                                                       | <b>Selection<br/>(sample size)</b>                                                                                                      | <b>Selection<br/>(participation<br/>rate)</b> | <b>Performance bias<br/>(outcome<br/>assessment)</b>                                                          | <b>Performance<br/>bias(analytical methods<br/>to control for bias)</b>            |
|------------------------------------|------------------------------------------------------------------------------------------------------------------------------------------------------------------------------------------------|-----------------------------------------------------------------------------------------------------------------------------------------|-----------------------------------------------|---------------------------------------------------------------------------------------------------------------|------------------------------------------------------------------------------------|
| <b>Low risk<br/>(score=2)</b>      | 1) Sample from the general population, not a select group;<br>2) Consecutive unselected population;<br>3) Rationale for case and control selection explained.                                  | 1) Sample size calculation performed and adequate.                                                                                      | 1) High response rate (>85%).                 | 1) Diagnosis using consistent criteria and direct examination.                                                | 1) Analysis appropriate for the type of sample (subgroup analysis/regression etc.) |
| <b>Moderate risk<br/>(score=1)</b> | 1) Sample selected from large population but selection criteria not defined;<br>2) Sample selection ambiguous but may be representative;<br>3) Rationale for cases and controls not explained; | 1) Sample size calculation performed and reasons for not meeting sample size given;<br>2) Sample size calculation not performed but all | 1) Moderate response rate (70-85%).           | 1) Assessment from administrative database or register;<br>2) Assessment from hospital record or interviewer. | 1) Analysis does not account for common adjustment.                                |

|                            |                                                                                                                                                   |                                                               |                                                                |                                                                                        |                    |
|----------------------------|---------------------------------------------------------------------------------------------------------------------------------------------------|---------------------------------------------------------------|----------------------------------------------------------------|----------------------------------------------------------------------------------------|--------------------|
|                            | 4) Eligibility criteria not explained;<br>5) Analysis to adjust for sampling strategy bias.                                                       | eligible persons studied.                                     |                                                                |                                                                                        |                    |
| <b>High risk (score=0)</b> | 1) Highly select population making it difficult to generalize finding;<br>2) Sample selection ambiguous and sample unlikely to be representative. | 1) Sample size estimation unclear or only sub-sample studied. | 1) Low response rate (<70%);<br>2) Response rate not reported. | 1) Assessment from non-validated data or generic estimate from the overall population. | 1) Data confusing. |

**eTable 3. Excluded studies with reasons**

| <b>Excluded Studies</b>                               | <b>Drugs</b>               | <b>Reason for exclusion</b>    |
|-------------------------------------------------------|----------------------------|--------------------------------|
| McAliste,2018(McAlister et al., 2018)                 | Direct oral anticoagulants | No outcome data                |
| Leef, 2019(Leef et al., 2019)                         | Direct oral anticoagulants | No outcome data                |
| Lee, 2019-A(Lee and Lee, 2019)                        | Direct oral anticoagulants | No outcome data                |
| Garcia Rodrigue, 2019(Garcia Rodriguez et al., 2019)  | Direct oral anticoagulants | No outcome data                |
| Falissard, 2019(Falissard et al., 2019)               | Apixaban                   | No outcome data                |
| Draper, 2017(Draper et al., 2017)                     | Direct oral anticoagulants | No outcome data                |
| De Caterina, 2019(De Caterina et al., 2019)           | Edoxaban                   | No outcome data                |
| Bell, 2016(Bell et al., 2016)                         | Direct oral anticoagulants | No outcome data                |
| Jacobs, 2019(Jacobs et al., 2019)                     | Direct oral anticoagulants | No outcome data                |
| Okumura, 2017(Okumura et al., 2017)                   | Direct oral anticoagulants | No outcome data                |
| Basaran, 2016(Basaran et al., 2016)                   | Direct oral anticoagulants | No outcome data                |
| Lee, 2019-B(Lee et al., 2019)                         | Direct oral anticoagulants | The same data source           |
| Lee, 2020(Lee and Choi, 2020)                         | Direct oral anticoagulants | No off-label DOACs dosing data |
| Soo Cho, 2020(Kakkar et al., 2013)                    | Direct oral anticoagulants | The same data source           |
| Inoue, 2019(Inoue et al., 2020)                       | Apixaban                   | No adjusted data               |
| Navarro-Almenzar, 2019(Navarro-Almenzar et al., 2019) | Direct oral anticoagulants | No adjusted data               |
| Yamaji, 2017(Yamaji et al., 2017)                     | Direct oral anticoagulants | No adjusted data               |
| Yiginer 2017(Yiginer et al., 2017)                    | Rivaroxaban                | No outcome data                |

|                                        |                            |                          |
|----------------------------------------|----------------------------|--------------------------|
| Viprey 2016(Viprey et al., 2016)       | Direct oral anticoagulants | No outcome data          |
| Vinter 2019(Vinter et al., 2019)       | Apixaban                   | No off-label dosing data |
| Umei 2017(Umei et al., 2017)           | Direct oral anticoagulants | No outcome data          |
| Tellor 2017(Tellor et al., 2017)       | Apixaban                   | No outcome data          |
| Tellor 2015(Tellor et al., 2015)       | Rivaroxaban                | No outcome data          |
| Suwa 2019(Suwa et al., 2019)           | Apixaban                   | No outcome data          |
| Sieg 2015(Sieg and Nappi, 2015)        | Direct oral anticoagulants | No outcome data          |
| Shrestha 2018(Shrestha et al., 2018)   | Direct oral anticoagulants | No outcome data          |
| Schwartz 2017(Schwartz et al., 2017)   | Direct oral anticoagulants | No outcome data          |
| Saunders 2019(Saunders et al., 2019)   | Direct oral anticoagulants | Not AF patients data     |
| Sato 2018(Sato et al., 2018)           | Direct oral anticoagulants | No outcome data          |
| Pisters 2017(Pisters et al., 2017)     | Direct oral anticoagulants | No outcome data          |
| Paciaroni 2019(Paciaroni et al., 2019) | Direct oral anticoagulants | Case control study       |
| Moudallel 2018(Moudallel et al., 2018) | Direct oral anticoagulants | No outcome data          |
| Lavoie 2016(Lavoie et al., 2016)       | Direct oral anticoagulants | No outcome data          |
| Kim 2019(Kim et al., 2019)             | Direct oral anticoagulants | Not off-label dose study |
| Khan 2016(Khan et al., 2016)           | Direct oral anticoagulants | No outcome data          |
| Kato 2018(Kato et al., 2018)           | Direct oral anticoagulants | No outcome data          |
| Kartas 2019(Kartas et al., 2019)       | Direct oral anticoagulants | No outcome data          |
| Jones 2020(Jones et al., 2020)         | Rivaroxaban                | No outcome data          |

|                                                     |                            |                          |
|-----------------------------------------------------|----------------------------|--------------------------|
| Hussain 2013(Hussain et al., 2013)                  | Dabigatran                 | No outcome data          |
| Howerton 2019(Howerton et al., 2019)                | Direct oral anticoagulants | No outcome data          |
| Hirsh Raccach 2019(Hirsh Raccach et al., 2019)      | Direct oral anticoagulants | No outcome data          |
| Gibson 2018(Gibson et al., 2018)                    | Apixaban                   | No outcome data          |
| Galaune 2019(Galaune et al., 2019)                  | Direct oral anticoagulants | No outcome data          |
| Eschler 2019(Eschler et al., 2019)                  | Direct oral anticoagulants | Not AF patients data     |
| Chowdhry 2016(Chowdhry et al., 2016)                | Dabigatran                 | No outcome data          |
| Chen 2018(Chen and Lin, 2018)                       | Direct oral anticoagulants | No outcome data          |
| Chan 2018(Chan et al., 2018)                        | Apixaban                   | Not off-label dose study |
| CainzosAchirica 2018(Cainzos-Achirica et al., 2018) | Dabigatran                 | No off-label dosing data |
| Buchholz 2018(Buchholz et al., 2018)                | Apixaban                   | No outcome data          |
| Bruneau 2019(Bruneau et al., 2019)                  | Direct oral anticoagulants | No outcome data          |
| Barra 2016(Barra et al., 2016)                      | Direct oral anticoagulants | No outcome data          |
| Alali 2019(Alali et al., 2019)                      | Dabigatran                 | No outcome data          |
| Ablefoni 2019(Ablefoni and Buchholz, 2019)          | Rivaroxaban                | No outcome data          |



**eTable 4. Detailed definition of DOACs under- or over-doses in the included studies**

| <b>Study</b>     | <b>Off-label definition</b>                                                                                                                                                                                                                                                                                                                                                                                                                                                                                                                                                                                                                                                                                                                                                                                                                                                                                      |
|------------------|------------------------------------------------------------------------------------------------------------------------------------------------------------------------------------------------------------------------------------------------------------------------------------------------------------------------------------------------------------------------------------------------------------------------------------------------------------------------------------------------------------------------------------------------------------------------------------------------------------------------------------------------------------------------------------------------------------------------------------------------------------------------------------------------------------------------------------------------------------------------------------------------------------------|
| Benjamin A, 2016 | Underdosed and overdosed DOACs were categorized according to U.S. FDA-approved package inserts (PIs). Dabigatran: 150 mg twice daily is standard dose; CrCl 30 to 50 mL/min: No dosage adjustment necessary unless patient receiving concomitant dronedarone, then consider reducing dabigatran to 75mg twice daily; CrCl 15 to 30 mL/min: 75 mg twice daily unless patient receiving concomitant dronedarone, then avoid concurrent use; CrCl <15 mL/min or on dialysis: not recommended. Rivaroxaban: 20 mg once daily is standard dose; CrCl 15 to 50 mL/min: 15 mg once daily; CrCl <15mL/min or on dialysis: Avoid use. Apixaban: 5 mg twice daily unless patient has any 2 of the following: Age ≥80 years, body weight ≤60 kg, or serum creatinine ≥1.5 mg/dL, then reduce dose to 2.5mg twice daily. On dialysis: 5 mg twice daily; reduce to 2.5 mg twice daily if age ≥80 years or body weight ≤60 kg. |
| Cheng, 2019      | Underdosed and overdosed DOACs were categorized according to ROCKET-AF or J-ROCKET dosage criteria. on-label dosing: patients received daily dose of rivaroxaban according to ROCKET-AF (20mg/d for patients with an eGFR ≥50 mL/min and 15 mg/d for those with an eGFR=30–49 mL/min) or J-ROCKET (15 mg/d for patients with an eGFR ≥50 mL/min and 10 mg/d for those with an eGFR=30–49 mL/min); off-label low-dosing: rivaroxaban at a daily dose of 10mg for patients with an eGFR ≥50 mL/min.                                                                                                                                                                                                                                                                                                                                                                                                                |
| Yao, 2017        | Underdosed and overdosed DOACs were categorized according to U.S. FDA-approved package inserts (PIs).Patients with a renal indication for dose reduction but who received standard dose DOACs (potential overdosing), patients with no renal indication but receiving reduced dose DOACs (potential underdosing).Patients were considered to have a renal indication for dose reduction if they were prescribed dabigatran and had an eGFR <30 ml/min/1.73 m <sup>2</sup> , rivaroxaban and an eGFR                                                                                                                                                                                                                                                                                                                                                                                                              |

|                  |                                                                                                                                                                                                                                                                                                                                                                                                                                                                                                                                                                                                                |
|------------------|----------------------------------------------------------------------------------------------------------------------------------------------------------------------------------------------------------------------------------------------------------------------------------------------------------------------------------------------------------------------------------------------------------------------------------------------------------------------------------------------------------------------------------------------------------------------------------------------------------------|
|                  | <50 ml/min/1.73 m <sup>2</sup> , The indication for dose reduction with apixaban requires 2 of the following 3 criteria: age≥80 years, weight<60 kg, and SCr level ≥1.5 mg/dl.                                                                                                                                                                                                                                                                                                                                                                                                                                 |
| Murata, 2018     | Underdosed and overdosed DOACs were categorized according to Japan-approved package inserts (PIs).The following low-dose regimens were considered to be appropriate: dabigatran, 110 mg (b.i.d.), for patients with a CrCl of 30–50 mL/min, age ≥70 years and a prior history of bleeding; rivaroxaban, 10 mg (o.d.), for patients with a CrCl of 15–50 mL/min; apixaban, 2.5 mg(b.i.d.), for patients with any 2 of the following characteristics: ≥80 years, body weight <60 kg and serum Cr level≥1.5 mg/dL; and edoxaban, 30 mg (o.d.), for patients with a CrCl of 15–50 mL/min or body weight is <60 kg. |
| Arbel, 2019      | Off-label dose-Reduced DOACs were in compliance with the approved label of Israel.                                                                                                                                                                                                                                                                                                                                                                                                                                                                                                                             |
| Ikeda, 2019      | 10 mg rivaroxaban in Japanese AF patients with CrCl ≥ 50 mL/min is considered as under-dose.                                                                                                                                                                                                                                                                                                                                                                                                                                                                                                                   |
| Briasoulis, 2020 | DOAC prescriptions do not adhere to the Food and Drug Administration (FDA) dosing criteria. Dabigatran: 150 mg twice daily is standard dose. CrCl 30 to 50 mL/min: No dosage adjustment necessary unless patient; receiving concomitant dronedarone, then consider reducing dabigatran to 75mg twice daily; CrCl 15 to 30 mL/min: 75 mg twice daily unless patient receiving concomitant dronedarone, then avoid concurrent use. Rivaroxaban: 20 mg once daily is standard dose. CrCl 15 to 50 mL/min: 15 mg once daily.                                                                                       |
| Salameh, 2020    | The recommended standard dose of apixaban is 5 mg bid. The use of apixaban at reduced adjusted dose (2.5 mg bid) if at least one of the following two criteria is fulfilled: eGFR of 15-29 ml/min or at least two of the following: age ≥80 years, weight ≤60kg or serum creatinine ≥1.5 mg/dL.                                                                                                                                                                                                                                                                                                                |
| Yu, 2020         | Dose reduction criteria is based on Korean label. Dabigatran: 150 mg twice daily is standard dose; CrCl 30 to 50 mL/min: 110 mg twice daily, if any of the following: CrCl30-50 mL/min, age ≥75 years. Rivaroxaban: 20 mg once daily is standard                                                                                                                                                                                                                                                                                                                                                               |

|               |                                                                                                                                                                                                                                                                                                                                                                                                                                                                                      |
|---------------|--------------------------------------------------------------------------------------------------------------------------------------------------------------------------------------------------------------------------------------------------------------------------------------------------------------------------------------------------------------------------------------------------------------------------------------------------------------------------------------|
|               | dose; 15mg once daily if CrCl 15-49mL/min. Apixaban: 5 mg twice daily unless patient has any 2 of the following: 2.5 mg twice daily, if at least 2 of age $\geq$ 80 years, body weight $\leq$ 60kg or serum creatinine level $\geq$ 1.5 mg/dL<br>2.5 mg twice daily, if CrCl 15-29 mL/min. Edoxaban: 60 mg once daily is standard dose; 30 mg once daily if any of the following: CrCl of 15-50mL/min, body weight $\leq$ 60kg, concomitant use of glycoprotein IIb/IIIa inhibitors. |
| Almeida, 2020 | The standard dose is 5 mg/bid for apixaban, 20 mg/qd for rivaroxaban, and 150 mg/qd for dabigatran; the underdosed is 2.5 mg bid. For apixaban, 15 mg qd for rivaroxaban and 75 mg/qd for dabigatran.                                                                                                                                                                                                                                                                                |

DOACs: direct oral anticoagulants; eGFR: estimated glomerular filtration rate; CrCl: creatinine clearance.

**eTable 5. Detailed definition of clinical outcomes in the included studies**

| <b>Study</b>     | <b>Clinical outcomes definition</b>                                                                                                                                                                                                                                                                                                                                                                                                                                                                                                                                                                                                                                                                                                                                                                   |
|------------------|-------------------------------------------------------------------------------------------------------------------------------------------------------------------------------------------------------------------------------------------------------------------------------------------------------------------------------------------------------------------------------------------------------------------------------------------------------------------------------------------------------------------------------------------------------------------------------------------------------------------------------------------------------------------------------------------------------------------------------------------------------------------------------------------------------|
| Benjamin A, 2016 | The outcomes of interest included all-cause death, stroke or systemic embolism, myocardial infarction, and major bleeding classified by International Society on Thrombosis and Haemostasis criteria.                                                                                                                                                                                                                                                                                                                                                                                                                                                                                                                                                                                                 |
| Cheng, 2019      | The clinical end points included ischemic stroke, intracranial hemorrhage. Patients were followed up until the occurrence of clinical end points or their last visits, which could be traced within the electrical medical record.                                                                                                                                                                                                                                                                                                                                                                                                                                                                                                                                                                    |
| Yao, 2017        | The stroke and major bleeding outcomes were identified using ICD-9 codes in the primary or secondary diagnosis positions of inpatient claims. Stroke or systemic embolism included ischemic stroke (ICD-9-CM codes: 433.x1, 434.x1, or 436), and systemic embolism (ICD-9-CM codes: 444.x). Major bleeding was categorized according to the International Society on Thrombosis and Haemostasis (ISTH) criteria: (1) Fatal bleeding, and/or, (2) Symptomatic bleeding in a critical area or organ, such as intracranial, intraspinal, intraocular, retroperitoneal, intraarticular or pericardial, or intramuscular with compartment syndrome, and/or, (3) Bleeding causing a fall in hemoglobin level of 2 g/dL or more, or leading to transfusion of two or more units of whole blood or red cells. |
| Murata, 2018     | Major bleeding was defined as a reduction in the Hb level of at least 2 g/dL, transfusion of at least 2 units of blood or symptomatic bleeding in a critical area or organ, and was specified as the endpoint of safety.                                                                                                                                                                                                                                                                                                                                                                                                                                                                                                                                                                              |
| Arbel, 2019      | The clinical outcomes were based on the primary ICD-9- CM Codes. Ischemic stroke: 433.x1, 434.x1; myocardial infarction: 410.x; intracranial hemorrhage: 430, 431, 432.x; gastrointestinal bleeding: 456.0, 456.20, 530.21, 530.7, 530.82, 531.0x, 531.2x, 531.4x, 531.6x, 532.0x, 532.2x, 532.4x, 532.6x, 533.0x, 533.2x, 533.4x, 533.6x, 534.0x, 534.2x, 534.4x, 534.6x, 535.x1, 537.83, 537.84, 562.02, 562.03, 562.12, 562.13 568.81, 569.3, 569.85, 578.x.                                                                                                                                                                                                                                                                                                                                       |
| Ikeda, 2019      | The outcomes were major bleeding, stroke, and myocardial infarction. Major bleeding was defined as the International Society of Thrombosis and Haemostasis (ISTH) criteria. Myocardial infarction is defined as typical symptoms plus                                                                                                                                                                                                                                                                                                                                                                                                                                                                                                                                                                 |

|                  |                                                                                                                                                                                                                                                                                                                                                                                                                                                                                                                                                                                                                                                                                                                                                            |
|------------------|------------------------------------------------------------------------------------------------------------------------------------------------------------------------------------------------------------------------------------------------------------------------------------------------------------------------------------------------------------------------------------------------------------------------------------------------------------------------------------------------------------------------------------------------------------------------------------------------------------------------------------------------------------------------------------------------------------------------------------------------------------|
|                  | elevation in the levels of cardiac biomarkers (troponin I, troponin T, or creatinine kinase-MB) above the upper limit of normal, new pathological Q waves in $\geq 2$ contiguous electrocardiographic leads, or confirmation at autopsy.                                                                                                                                                                                                                                                                                                                                                                                                                                                                                                                   |
| Briasoulis, 2020 | The clinical outcomes were based on the primary ICD-9- CM diagnosis. Ischemic stroke: 433*, 434*, 436*, 4371, 4378, 4379. Gastrointestinal bleeding: 4552, 4555, 4558, 4560, 45620, 5307, 53082, 5310-5316, 5320-5326, 5330-5336, 5340-5346, 53501-53561, 56202-56203, 56212-56213, 5693, 56985, 5780, 5781, 5789, 53783, 56881. Major bleeding: 59970, 59971, 59972, 71911, 7847*, 7848x, 7863*, 4230*, 4590*, 852*, 853*.                                                                                                                                                                                                                                                                                                                                |
| Salameh, 2020    | The efficacy outcomes were defined as hospital discharge diagnoses of ischemic stroke (ICD 9 codes: 433.x1, 434.x1, 436) or systemic arterial embolism (ICD 9 codes: 444.x, 445.x). Safety outcomes were defined as a hospital discharge diagnosis of major bleeding including intracranial hemorrhage and major gastrointestinal bleeding.                                                                                                                                                                                                                                                                                                                                                                                                                |
| Yu, 2020         | The outcomes were stroke or systemic embolism, major bleeding, death, intracranial bleeding, gastrointestinal bleeding, and myocardial infarction. Stroke or systemic embolism was defined from diagnosis of ischemic stroke with concomitant imaging studies of the brain or related death. Intracranial hemorrhage (ICH) was defined from admission diagnosis of ICH with concomitant imaging studies of the brain or related death. Gastrointestinal bleeding was defined from admission diagnosis or related death. Major bleeding was defined from ICH, gastrointestinal bleeding, or anemia caused by bleeding. Myocardial infarction was defined from admission diagnosis of MI with concomitant use of dual antiplatelet therapy or related death. |
| Almeida, 2020    | The outcome included stroke or systemic embolism, and major bleeding.                                                                                                                                                                                                                                                                                                                                                                                                                                                                                                                                                                                                                                                                                      |

DOACs: direct oral anticoagulants; eGFR: estimated glomerular filtration rate; CrCl: creatinine clearance; MI: myocardial infarction.

**eTable 6. Detailed demographics and clinical characteristics of the included studies**

| <b>Study</b>                             | <b>Mean age (y)</b> | <b>Female (%)</b> | <b>HF (%)</b> | <b>HBP (%)</b> | <b>DM (%)</b> | <b>TIA (%)</b> | <b>MI (%)</b> | <b>Co-antiplatelet agents</b> | <b>BMI (kg/m<sup>2</sup>)</b> | <b>CrCl (mL/min)</b> | <b>CHA2D<sub>2</sub>-S<sub>2</sub>-VASc&gt;2</b> | <b>CHADS<sub>2</sub>-VASc (mean)</b> | <b>HAS-BLED (mean)</b> | <b>Vascular disease</b> |
|------------------------------------------|---------------------|-------------------|---------------|----------------|---------------|----------------|---------------|-------------------------------|-------------------------------|----------------------|--------------------------------------------------|--------------------------------------|------------------------|-------------------------|
| Benjamin A, 2016(Steinberg et al., 2016) | 71.0                | 41.8              | 20.7          | NR             | NR            | NR             | NR            | NR                            | 31.4                          | 89.2                 | 87.0                                             | NR                                   | NR                     | NR                      |
| Cheng, 2019(Cheng et al., 2019)          | 75.7                | 36.0              | 25.5          | 56.9           | 21.9          | 2.30           | NR            | 23.7                          | NR                            | NR                   | NR                                               | 2.9                                  | NR                     | NR                      |
| Yao, 2017(Yao et al., 2017)              | 77.5                | 49.5              | 51.7          | 97.8           | 54.2          | NR             | NR            | 12.2                          | NR                            | NR                   | 99.5                                             | NR                                   | NR                     | 43.2                    |
| Murata, 2018(Murata et al., 2019)        | 71.7                | 28.5              | NR            | 69.4           | 21.6          | 10.1           | NR            | 12.7                          | 24.1                          | 70.5                 | NR                                               | 2.9                                  | 1.3                    | 11.7                    |
| Arbel, 2019(Morris et al., 2019)         | 76.0                | 52.5              | 28.5          | 96.0           | 59.0          | NR             | NR            | 43.5                          | 30.0                          | NR                   | NR                                               | 4.7                                  | NR                     | 17.5                    |
| Ikeda, 2019(Ikeda et al., 2019)          | 71.2                | 33.5              | 22.1          | 74.9           | 23.3          | 21.2           | NR            | 13.5                          | 24.6                          | 75.5                 | NR                                               | 3.2                                  | 1.4                    | 3.4                     |

|                                                 |      |      |      |      |      |      |      |      |    |      |    |     |     |      |
|-------------------------------------------------|------|------|------|------|------|------|------|------|----|------|----|-----|-----|------|
| Briasoulis,<br>2020(Briasoulis et<br>al., 2020) | 51.2 | 52.3 | NR   | NR   | NR   | NR   | NR   | NR   | NR | NR   | NR | NR  | NR  | NR   |
| Salameh,<br>2020(Kakkar et al.,<br>2013)        | 78.7 | 51.7 | 32.6 | 90.1 | 46.4 | 10.3 | 31.9 | 48.9 | NR | 63.8 | NR | 4.8 | 2.8 | NR   |
| Yu, 2020(Connolly<br>et al., 2009)              | 70.5 | 39.7 | 61.2 | 96.3 | 31.6 | 45.5 | 11.7 | 25.5 | NR | NR   | NR | 4.6 | NR  | 28.8 |
| Almeida,<br>2020(Patel et al.,<br>2011)         | 84.0 | 65.9 | 70.5 | 85.5 | 36.4 | 23.0 | NR   | NR   | NR | 75.8 | NR | 5.1 | 2.5 | 15.8 |

BMI: Body Mass Index; CrCl: creatinine clearance rate; DM: Diabetes; HF: heart failure; HBP: hypertension; TIA: transient ischemic attack; MI: myocardial infarction; NR: not reported.

**eTable 7. Quality scores of the included studies**

| <b>Study</b>     | <b>Sample population</b> | <b>Sample size</b> | <b>Participation rate</b> | <b>Outcome assessment</b> | <b>Analytical methods to control for bias</b> | <b>Total score</b> |
|------------------|--------------------------|--------------------|---------------------------|---------------------------|-----------------------------------------------|--------------------|
| Benjamin A, 2016 | 2                        | 2                  | 2                         | 1                         | 2                                             | 9                  |
| Cheng, 2019      | 2                        | 2                  | 2                         | 1                         | 2                                             | 9                  |
| Yao, 2017        | 2                        | 2                  | 2                         | 1                         | 2                                             | 9                  |
| Murata, 2018     | 2                        | 2                  | 2                         | 1                         | 2                                             | 9                  |
| Arbel, 2019      | 2                        | 2                  | 2                         | 1                         | 2                                             | 9                  |
| Ikeda, 2019      | 2                        | 2                  | 2                         | 1                         | 2                                             | 9                  |
| Briasoulis, 2020 | 2                        | 2                  | 2                         | 1                         | 2                                             | 9                  |
| Salameh, 2020    | 2                        | 2                  | 2                         | 1                         | 2                                             | 9                  |
| Yu, 2020         | 2                        | 2                  | 2                         | 1                         | 2                                             | 9                  |
| Almeida, 2020    | 2                        | 2                  | 2                         | 1                         | 1                                             | 8                  |



**eTable 8. Sensitivity analysis of clinical outcome in under-dose DOACs**

| <b>Study omitted</b> | <b>Stroke:<br/>HR (95%CI)</b> | <b>Major bleeding :<br/>HR (95%CI)</b> | <b>ICH:<br/>HR (95%CI)</b> | <b>GIB:<br/>HR (95%CI)</b> | <b>Death :<br/>HR (95%CI)</b> | <b>MI:<br/>HR (95%CI)</b> |
|----------------------|-------------------------------|----------------------------------------|----------------------------|----------------------------|-------------------------------|---------------------------|
| Benjamin A, 2016     | 1.01 (0.93-1.09)              | 1.01 (0.77-1.24)                       |                            |                            | 1.41 (0.95-1.87)              | 1.07 (0.88-1.25)          |
| Cheng, 2019          | 1.00 (0.92-1.09)              |                                        |                            |                            |                               |                           |
| Murata, 2018         | 1.01 (0.93-1.09)              | 1.05 (0.84-1.25)                       |                            |                            | 1.35 (0.98-1.72)              |                           |
| Arbel, 2019          | 1.01 (0.92-1.09)              |                                        |                            |                            | 1.10 (0.98-1.21)              | 1.10 (0.90-1.29)          |
| Ikeda, 2019          | 1.01 (0.92-0.09)              | 1.01 0.76-1.26)                        | 1.04 (0.61-1.47)           |                            |                               | 1.07 (0.89-1.25)          |
| Briasoulis, 2020     | 1.01 (0.93-1.10)              | 0.94 (0.68-1.21)                       | 1.11 (0.73-1.49)           | 1.19 (0.57-1.81)           |                               |                           |
| Salameh, 2020        | 1.01 (0.92-1.09)              | 0.90 (0.74-1.07)                       | 0.99 (0.67-1.33)           | 0.96 (0.81-1.12)           |                               |                           |
| Yu, 2020             | 1.04 (0.87-1.20)              | 0.96 (0.66-1.27)                       | 0.99 (0.56-1.43)           | 1.27 (0.82-1.73)           | 1.54 (1.28-1.79)              | 0.98 (0.54-1.42)          |
| Cheng, 2019          |                               |                                        | 1.22 (0.97-1.47)           |                            |                               |                           |
| Almeida, 2020        |                               |                                        |                            |                            | 1.37 (0.94-1.79)              |                           |

CI: confidence interval.

**eTable 9. Sensitivity analysis of clinical outcome in over-dose DOACs**

| <b>Study omitted</b> | <b>Stroke:<br/>HR (95%CI)</b> | <b>Major bleeding :<br/>HR (95%CI)</b> | <b>ICH:<br/>HR (95%CI)</b> | <b>GIB:<br/>HR (95%CI)</b> | <b>Death :<br/>HR (95%CI)</b> | <b>MI:<br/>HR (95%CI)</b> |
|----------------------|-------------------------------|----------------------------------------|----------------------------|----------------------------|-------------------------------|---------------------------|
| Benjamin A, 2016     | 1.18 (1.04-1.32)              | 1.15 (1.02-1.29)                       |                            |                            | 1.19 (1.01-1.37)              | 1.01 (0.73-1.29)          |
| Murata, 2018         | 1.18 (1.04-1.32)              | 1.16 (1.03-1.29)                       |                            |                            | 1.26 (0.85-1.66)              |                           |
| Briasoulis, 2020     | 1.17 (1.00-1.33)              | 1.21 (1.03-1.39)                       | 1.27 (0.80-1.74)           | 1.17 (0.96-1.38)           |                               |                           |
| Yu, 2020             | 1.24 (0.95-1.52)              | 1.20 (0.89-1.51)                       | 1.16 (0.78-1.53)           | 1.08 (0.97-1.28)           | 1.95 (0.75-3.15)              | 0.31 (0.00-1.26)          |
| Yao, 2017            | 1.18 (1.04-1.32)              | 1.16 (1.02-1.29)                       |                            |                            |                               |                           |

CI: confidence interval.

**eTable 10. Meta-regression of clinical outcome in under-dose DOACs**

| <b>Variables</b>       | <b>Stroke: <i>P</i> value</b> | <b>MI: <i>P</i> value</b> | <b>Death: <i>P</i> value</b> | <b>Major bleeding:<br/><i>P</i> value</b> | <b>ICH: <i>P</i> value</b> | <b>GIB: <i>P</i> value</b> |
|------------------------|-------------------------------|---------------------------|------------------------------|-------------------------------------------|----------------------------|----------------------------|
| Mean age               | 0.800                         | 0.642                     | 0.657                        | 0.773                                     | 0.666                      | 0.813                      |
| Female                 | 0.907                         | 0.817                     | 0.949                        | 0.734                                     | 0.877                      | 0.831                      |
| HF                     | 0.135                         | 0.290                     | 0.469                        | 0.524                                     | 0.335                      |                            |
| HBP                    | 0.216                         | 0.532                     | 0.375                        | 0.425                                     | 0.471                      |                            |
| DM                     | 0.862                         | 0.938                     | 0.724                        | 0.682                                     | 0.696                      |                            |
| TIA                    | 0.194                         |                           | 0.422                        | 0.333                                     | 0.276                      |                            |
| MI                     |                               |                           |                              | 0.563                                     |                            |                            |
| Co-antiplatelet agents | 0.657                         | 0.978                     | 0.793                        | 0.563                                     | 0.649                      |                            |
| BMI                    | 0.679                         | 0.704                     | 0.687                        | 0.951                                     |                            |                            |
| CrCl                   | 0.646                         |                           | 0.681                        | 0.783                                     |                            |                            |
| CHADS2-VASc            | 0.261                         |                           | 0.703                        | 0.470                                     | 0.526                      |                            |
| HAS-BLED               | 0.469                         |                           |                              | 0.533                                     |                            |                            |
| Vascular disease       | 0.265                         | 0.443                     | 0.400                        | 0.458                                     |                            |                            |

BMI: Body Mass Index; CrCl: creatinine clearance rate; DM: Diabetes; HF: heart failure; HBP: hypertension; TIA: transient ischemic attack;

MI: myocardial infarction

**eTable 11. Meta-regression of clinical outcome in over-dose DOACs**

| <b>Variables</b>       | <b>Stroke: <i>P</i> value</b> | <b>Major bleeding: <i>P</i> value</b> | <b>Death: <i>P</i> value</b> | <b>ICH: <i>P</i> value</b> | <b>GIB: <i>P</i> value</b> | <b>MI: <i>P</i> value</b> |
|------------------------|-------------------------------|---------------------------------------|------------------------------|----------------------------|----------------------------|---------------------------|
| Mean age               | 0.861                         | 0.961                                 | 0.813                        |                            |                            |                           |
| Female                 | 0.902                         | 0.721                                 | 0.831                        |                            |                            |                           |
| HF                     | 0.464                         | 0.486                                 |                              |                            |                            |                           |
| HBP                    | 0.550                         | 0.566                                 |                              |                            |                            |                           |
| DM                     | 0.924                         | 0.863                                 |                              |                            |                            |                           |
| TIA                    |                               |                                       |                              |                            |                            |                           |
| MI                     | 0.413                         |                                       |                              |                            |                            |                           |
| Co-antiplatelet agents |                               | 0.432                                 |                              |                            |                            |                           |
| BMI                    |                               |                                       |                              |                            |                            |                           |
| CrCl                   |                               |                                       |                              |                            |                            |                           |
| CHADS2-VASc            | 0.796                         |                                       |                              |                            |                            |                           |
| HAS-BLED               | 0.861                         |                                       |                              |                            |                            |                           |
| Vascular disease       | 0.902                         | 0.851                                 |                              |                            |                            |                           |

BMI: Body Mass Index; CrCl: creatinine clearance rate; DM: Diabetes; HF: heart failure; HBP: hypertension; TIA: transient ischemic attack; MI: myocardial infarction

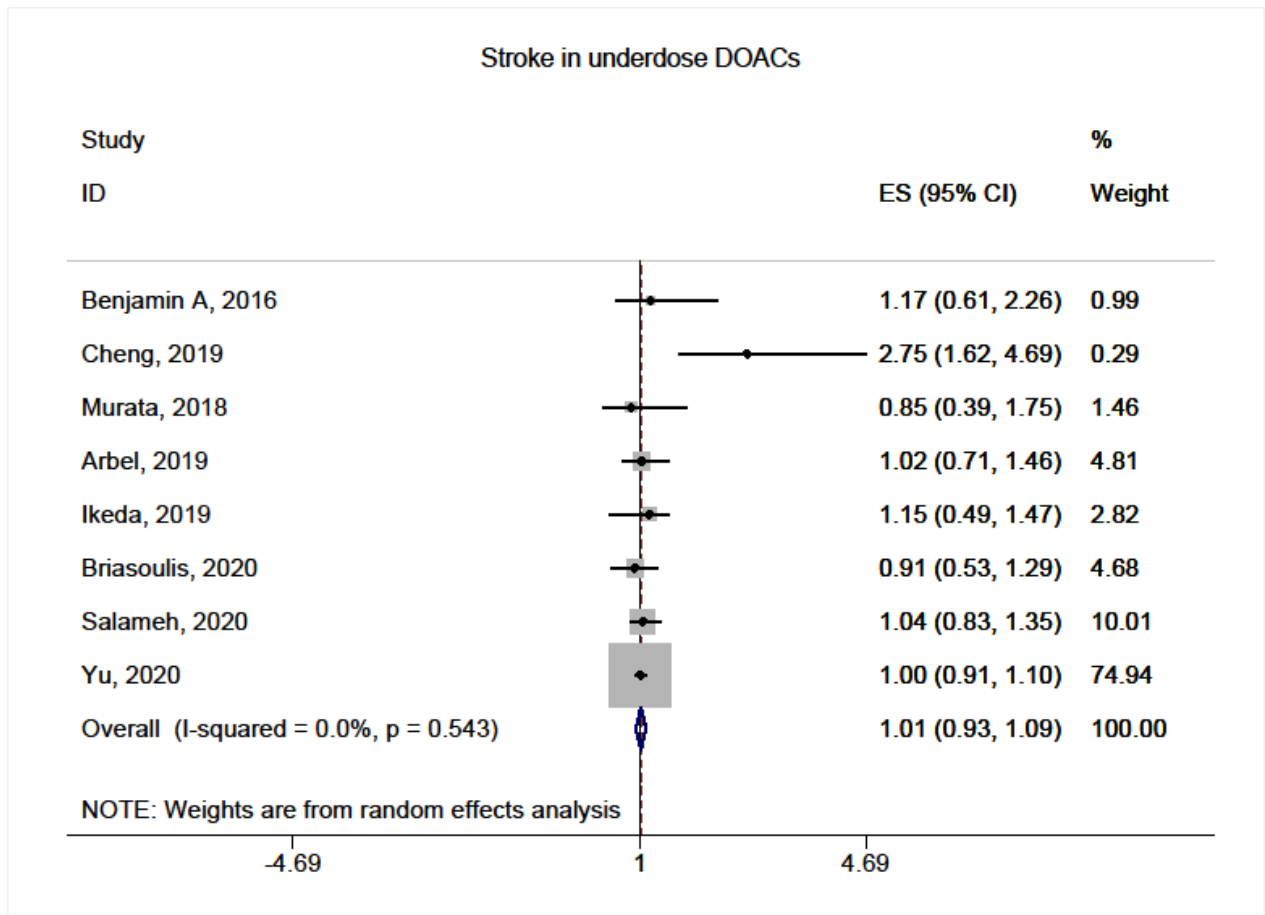

**eFigure 1. Pooled stroke in under-dosing of DOACs**

Major bleeding in underdose DOACs

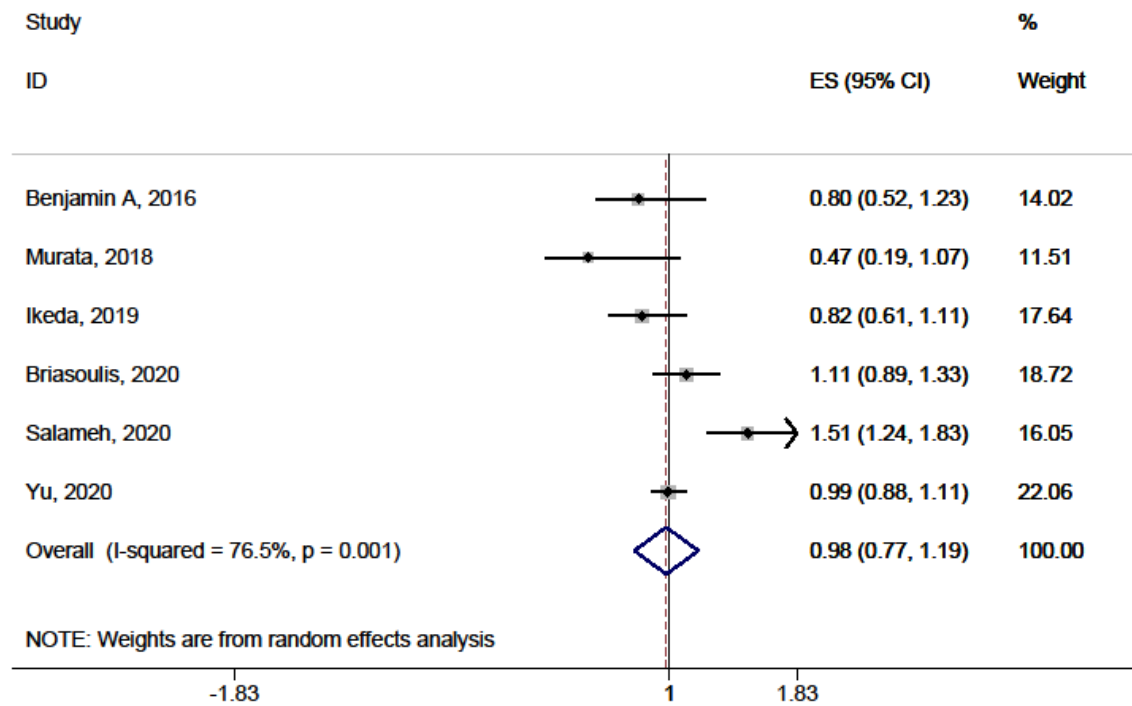

**eFigure 2. Pooled major bleeding in under-dosing of DOACs**

ICH in underdose DOACs

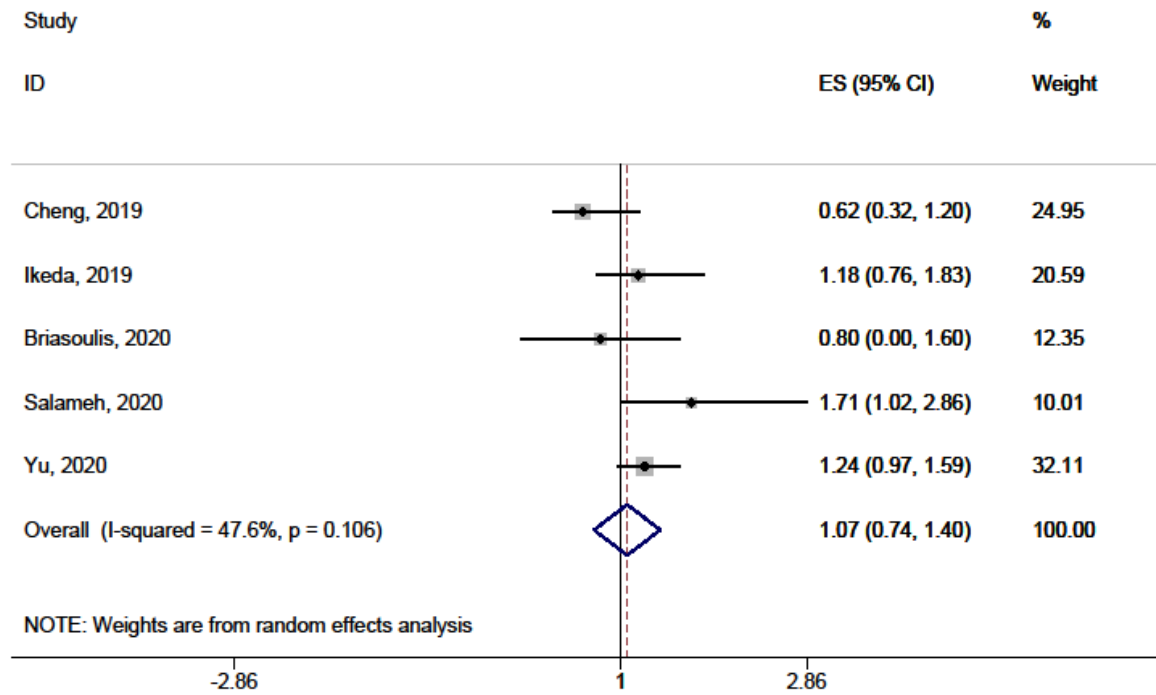

**eFigure 3. Pooled ICH in under-dosing of DOACs**

GIB in underdose DOACs

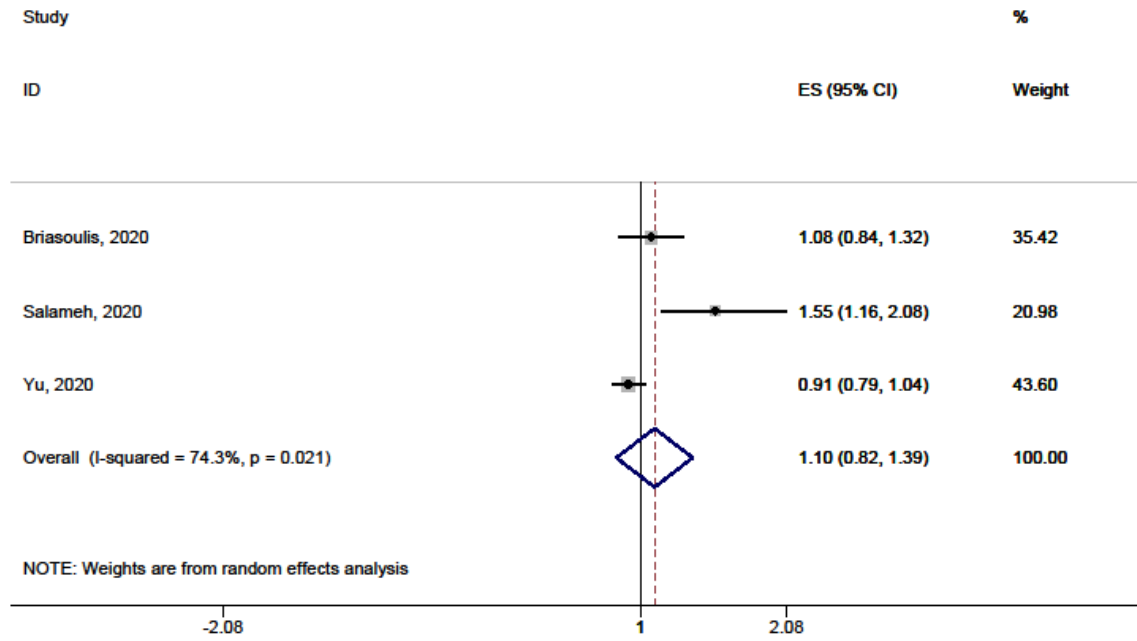

**eFigure 4. Pooled GIB in under-dosing of DOACs**



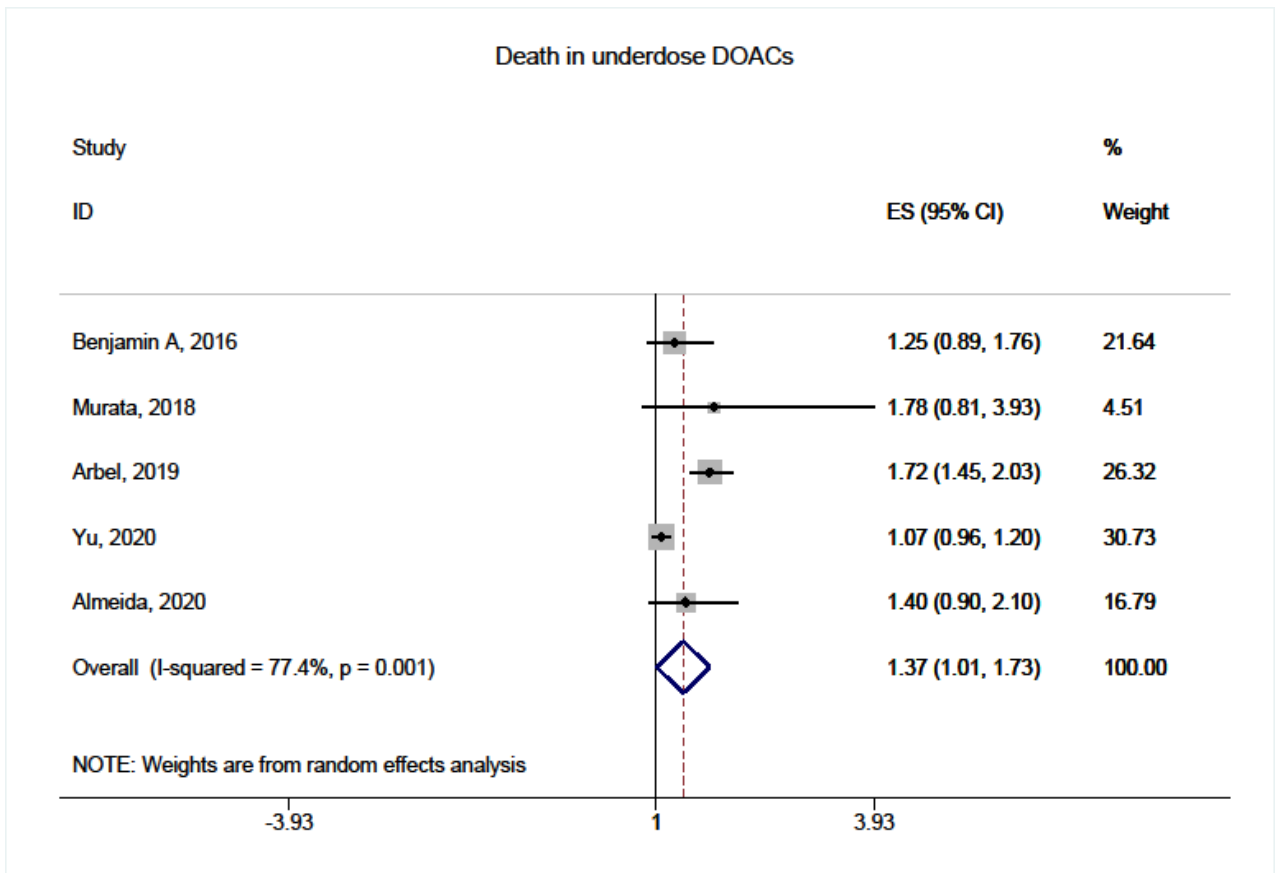

**eFigure 5. Pooled Death in under-dosing of DOACs**

MI in underdose DOACs

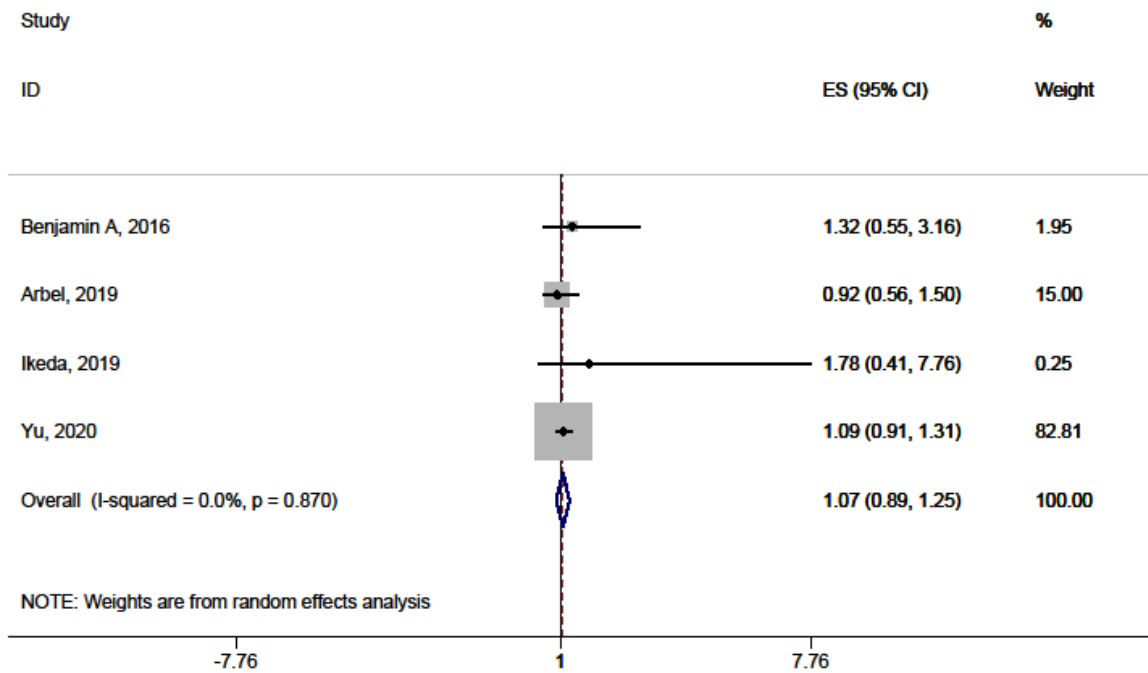

**eFigure 6. Pooled MI in under-dosing of DOACs**

### Stroke in underdose individual DOAC

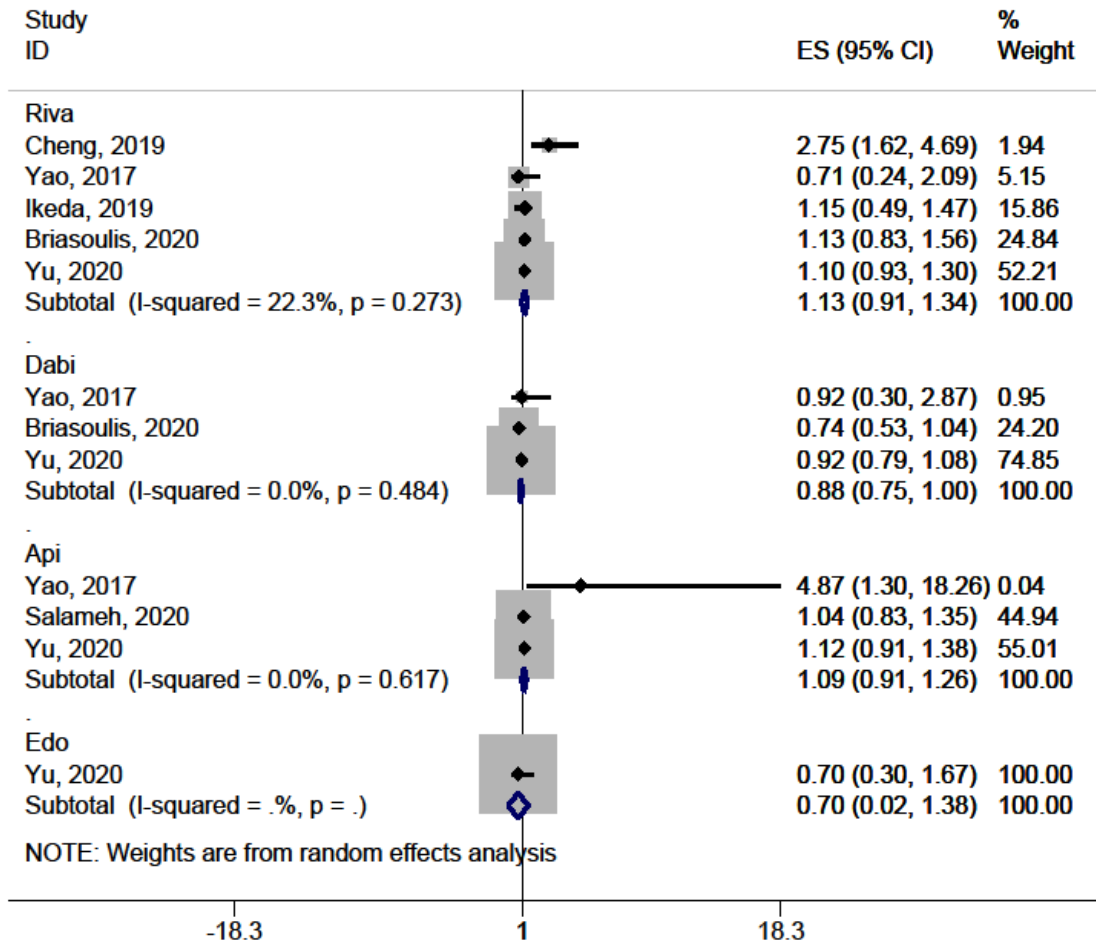

**eFigure 7. Pooled stroke in under-dosing of individual DOAC**

### Major bleeding in underdose individual DOAC

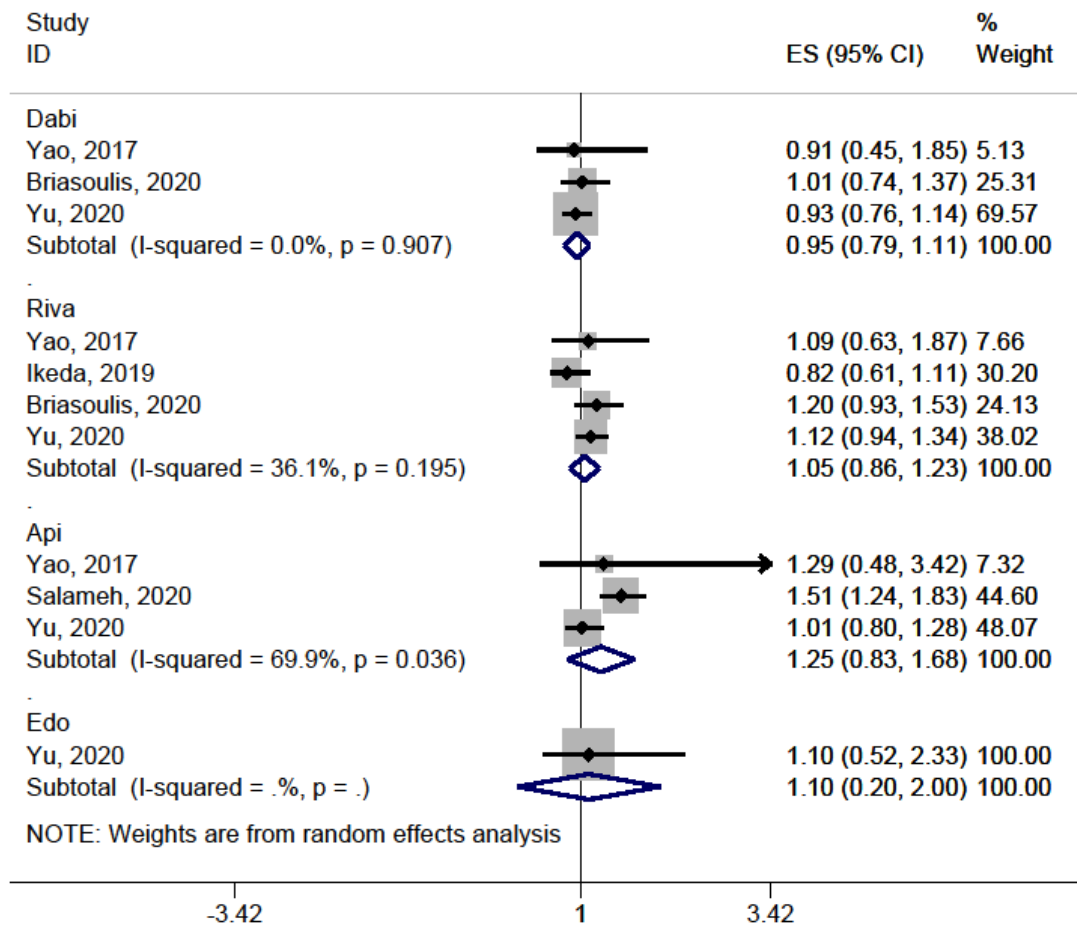

**eFigure 8. Pooled major bleeding in under-dosing of individual DOAC**

### ICH in underdose individual DOAC

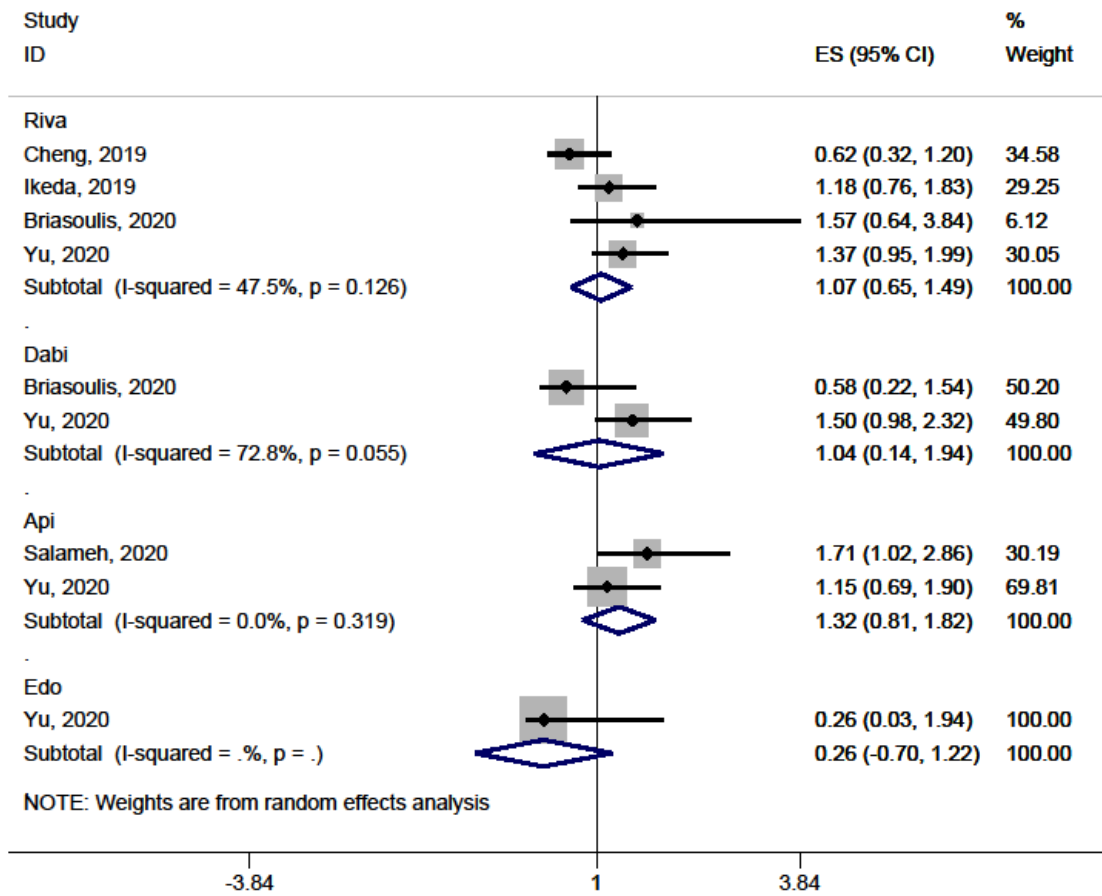

**eFigure 9. Pooled ICH in under-dosing of individual DOAC**

### GIB in underdose individual DOAC

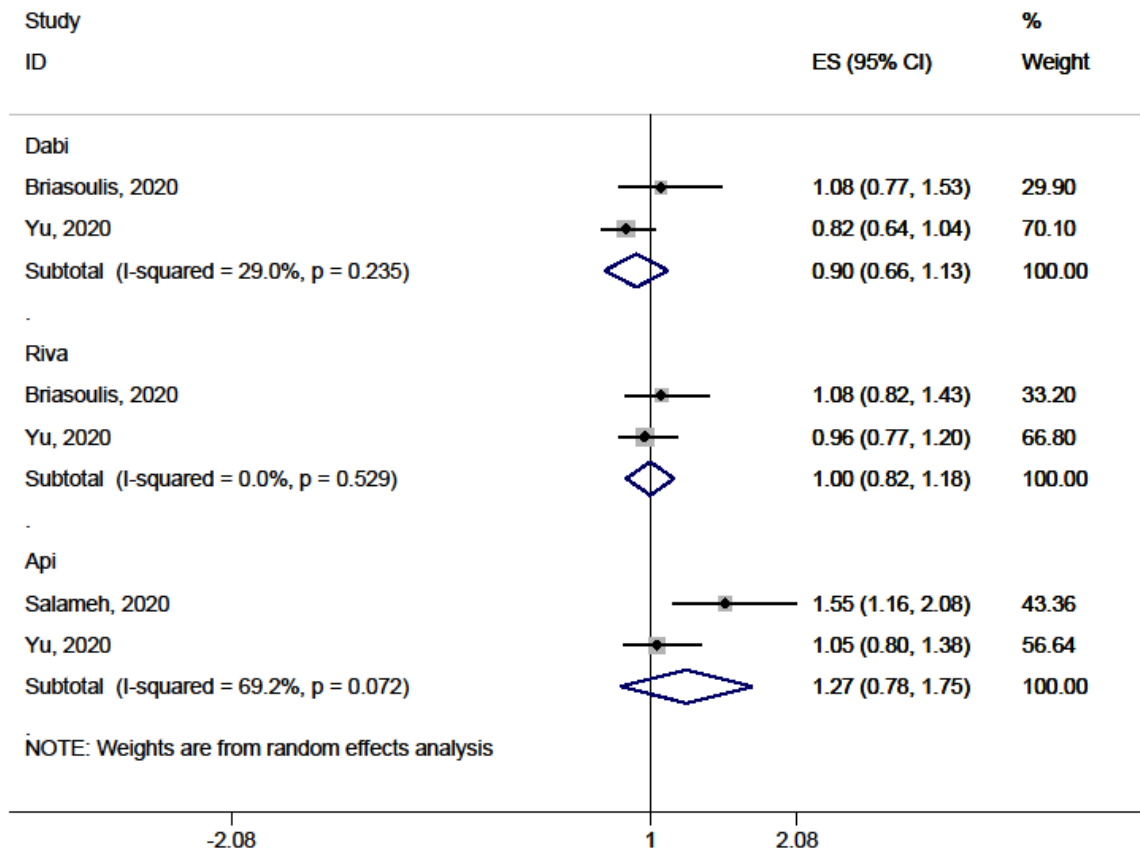

**eFigure 10. Pooled GIB in under-dosing of individual DOAC**

MI in underdose individual DOAC

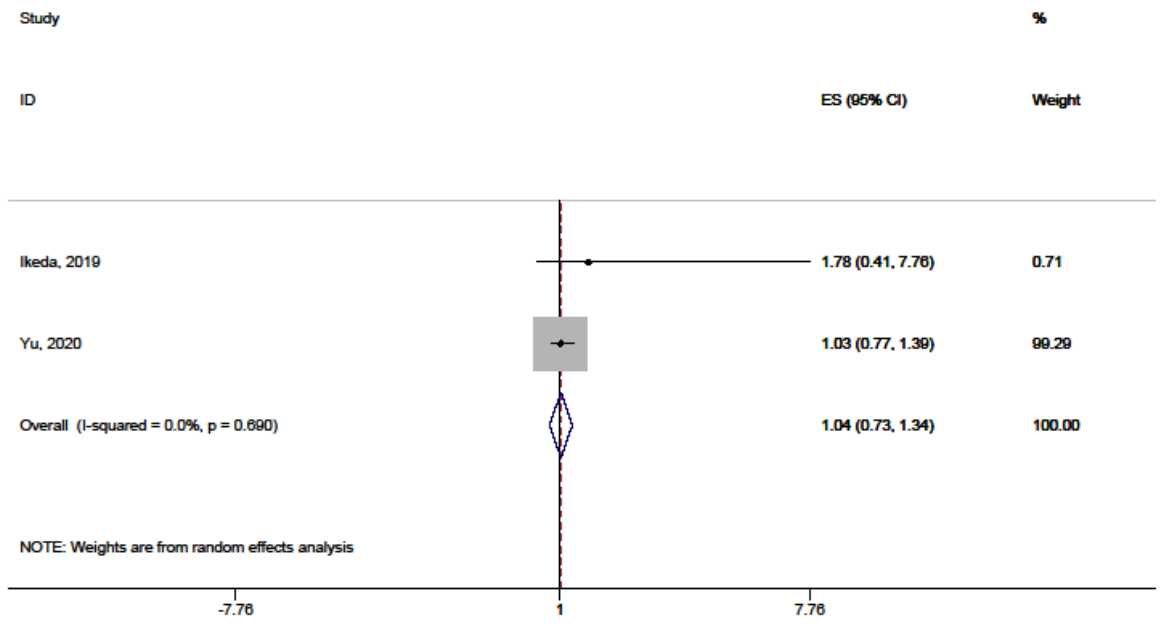

**eFigure 11. Pooled MI in under-dosing of individual DOAC**

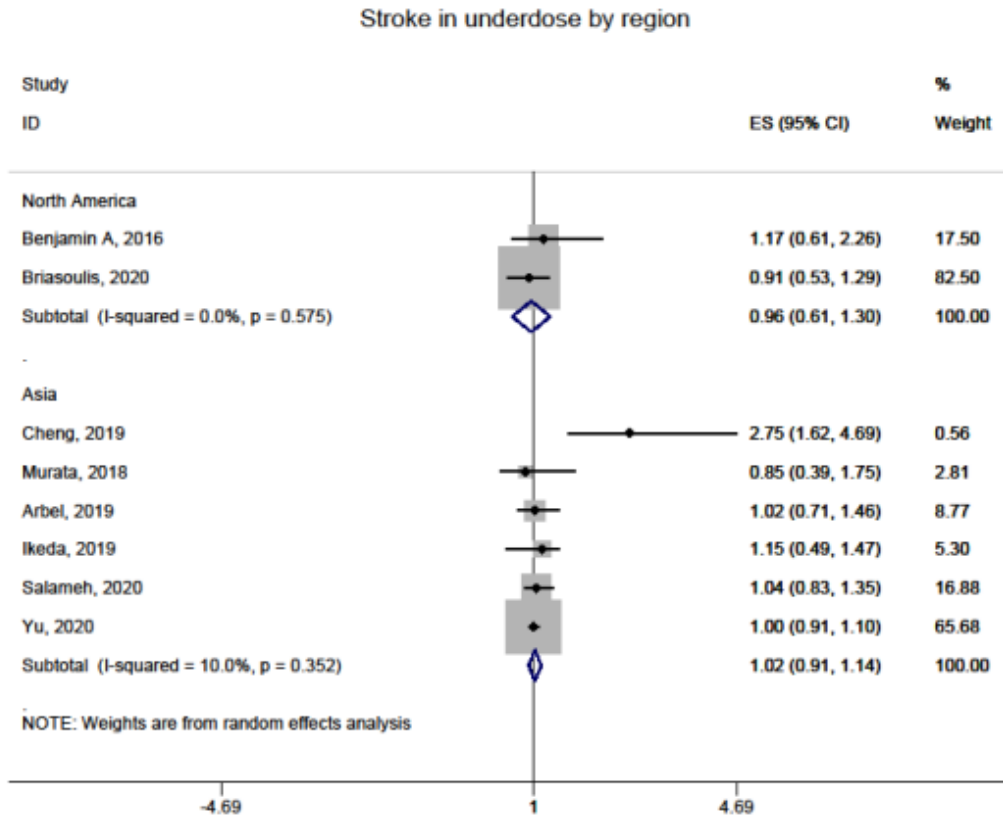

**eFigure 12-1. Pooled stroke in under-dose by region**

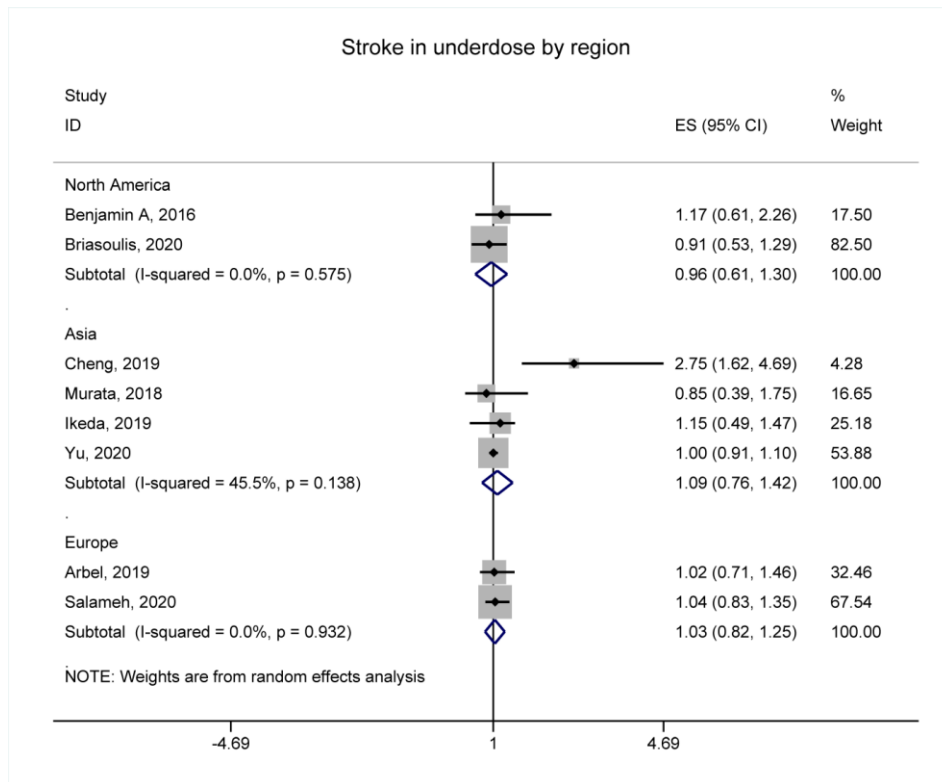

**eFigure 12-2. Pooled stroke in under-dose by region (categorizing Israel as Europe)**



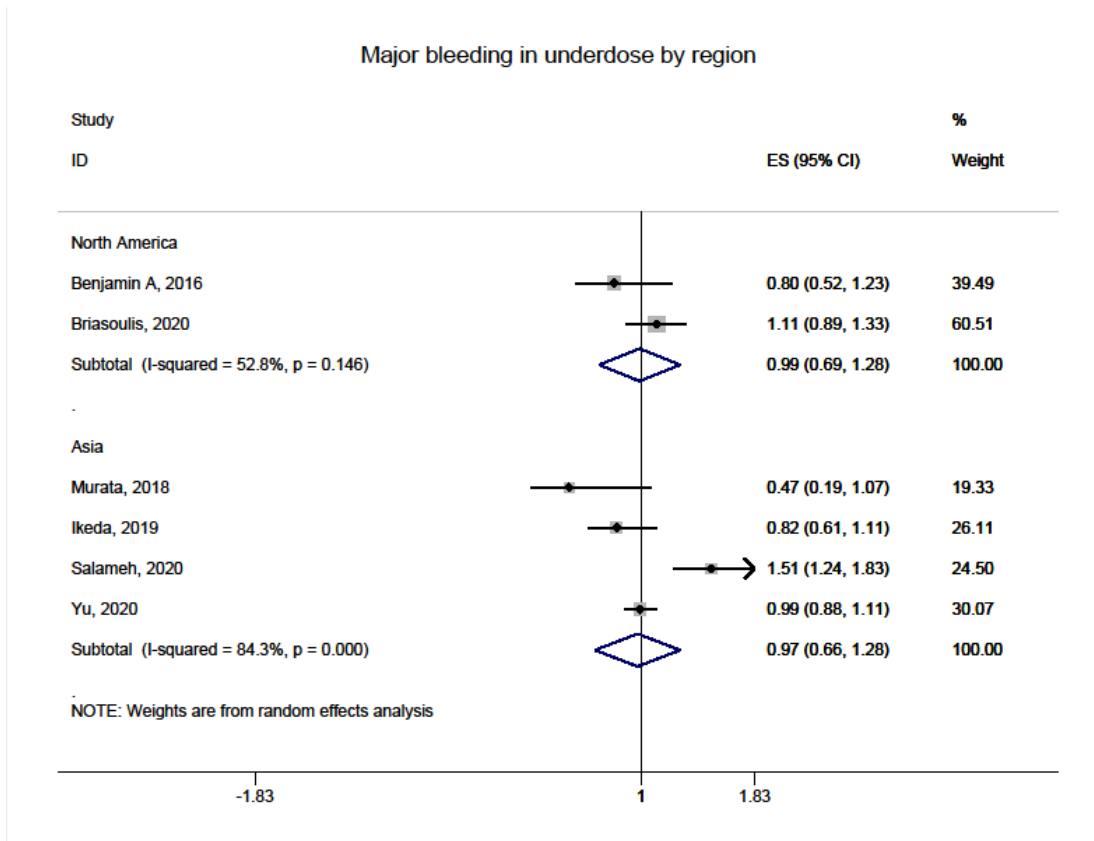

**eFigure 13-1. Pooled major bleeding in under-dose by region**

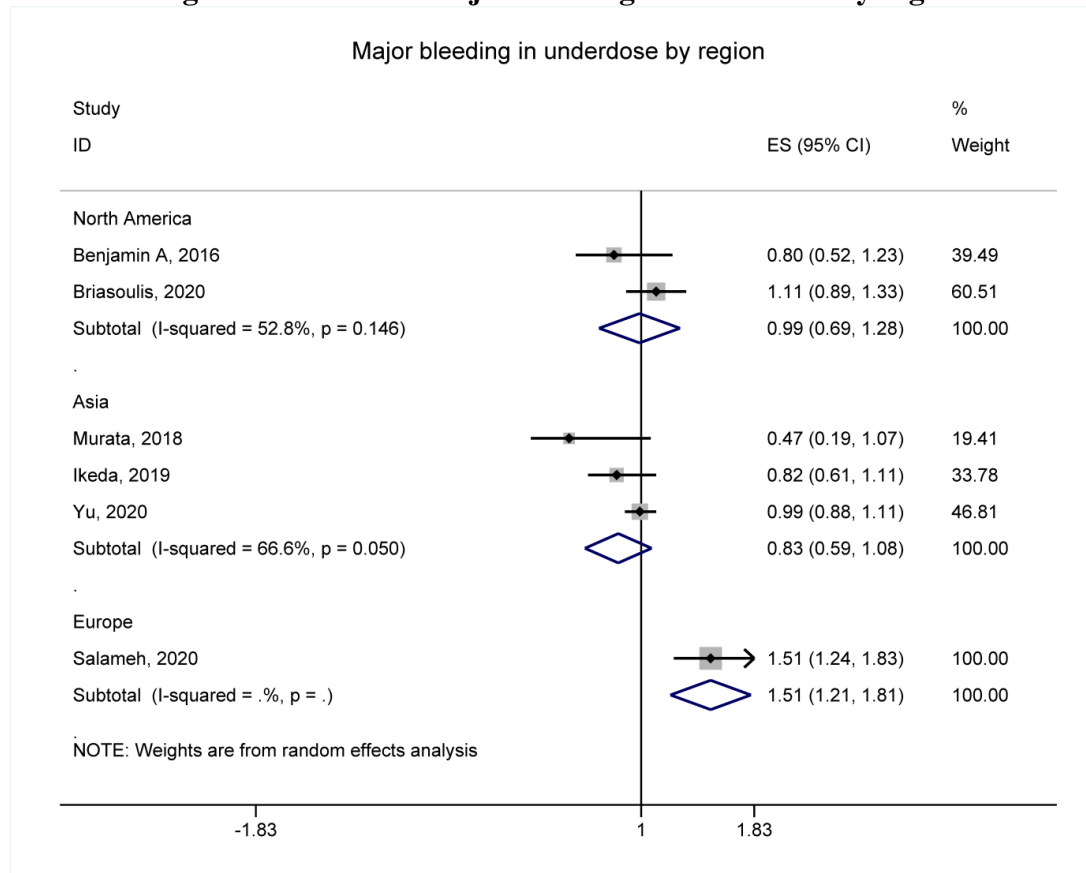

**eFigure 13-2. Pooled major bleeding in under-dose by region (categorizing Israel as Europe)**

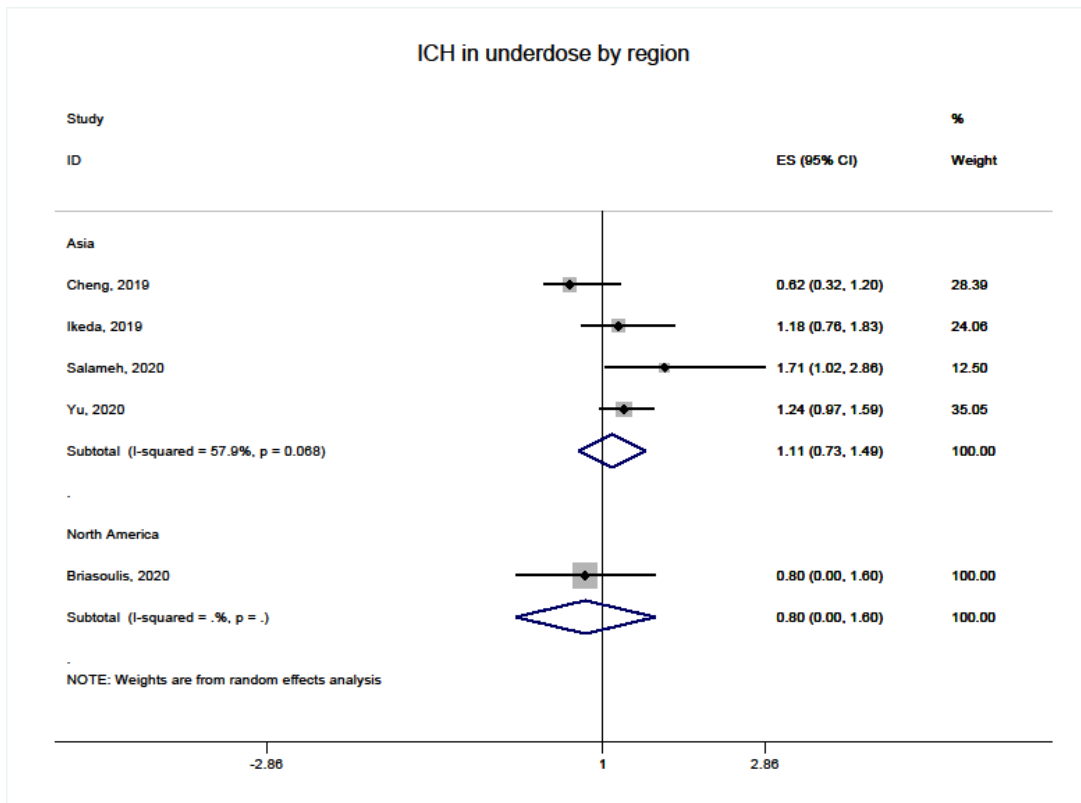

**eFigure 14-1. Pooled ICH in under-dose by region**

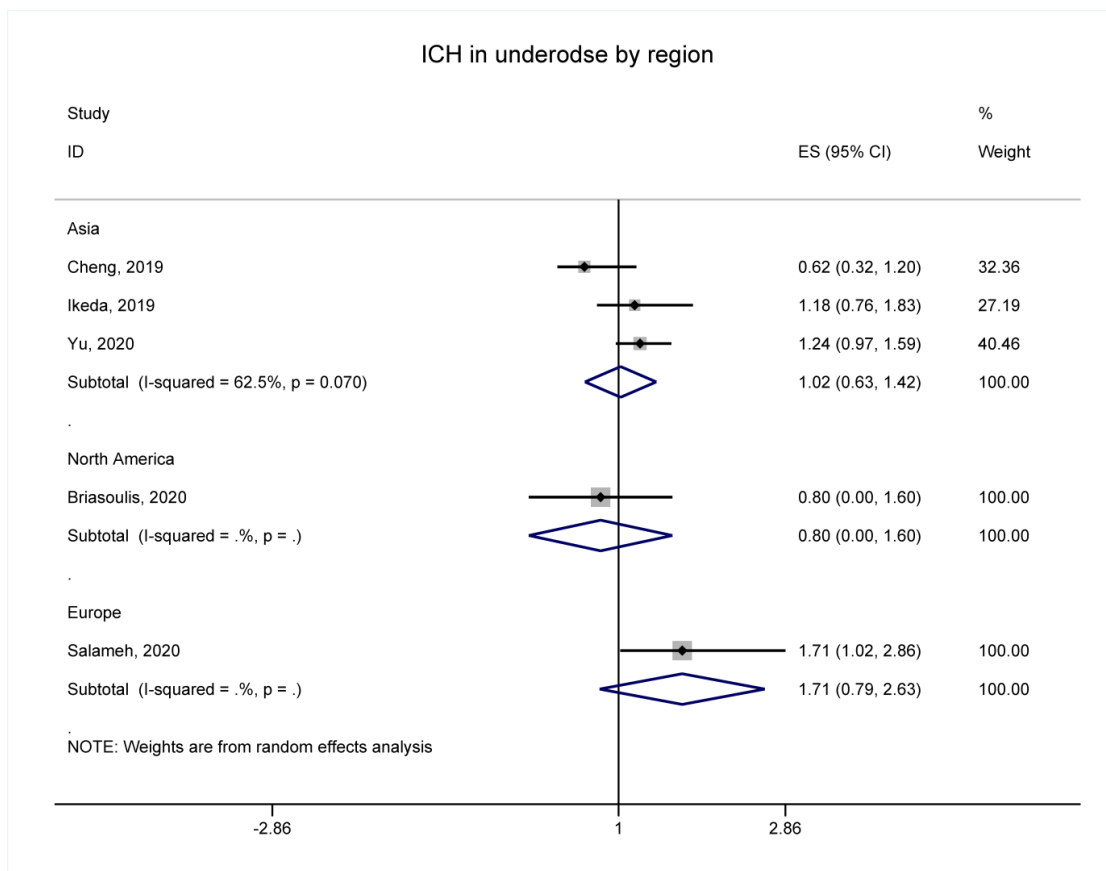

**eFigure 14-2. Pooled ICH in under-dose by region (categorizing Israel as Europe)**

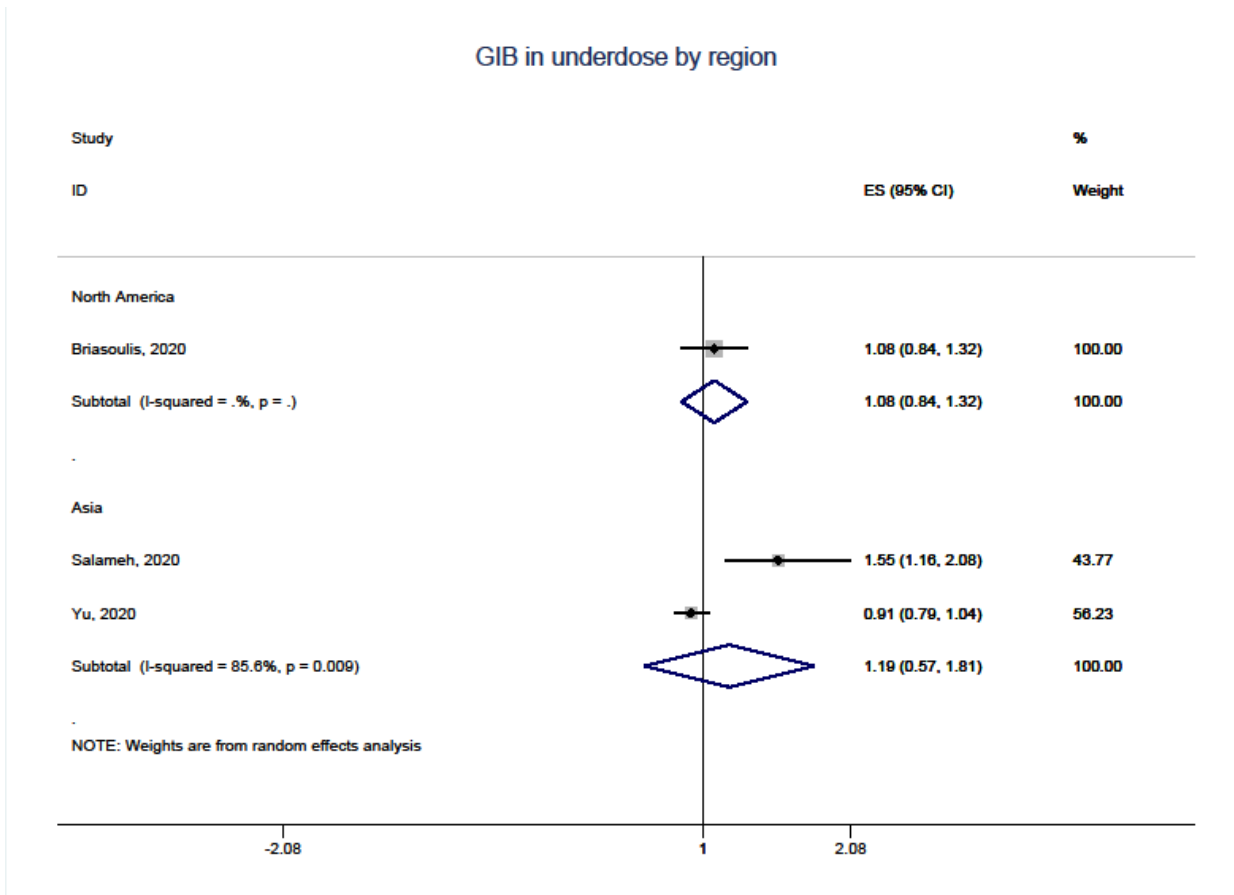

**eFigure 15-1. Pooled GIB in under-dose by region**

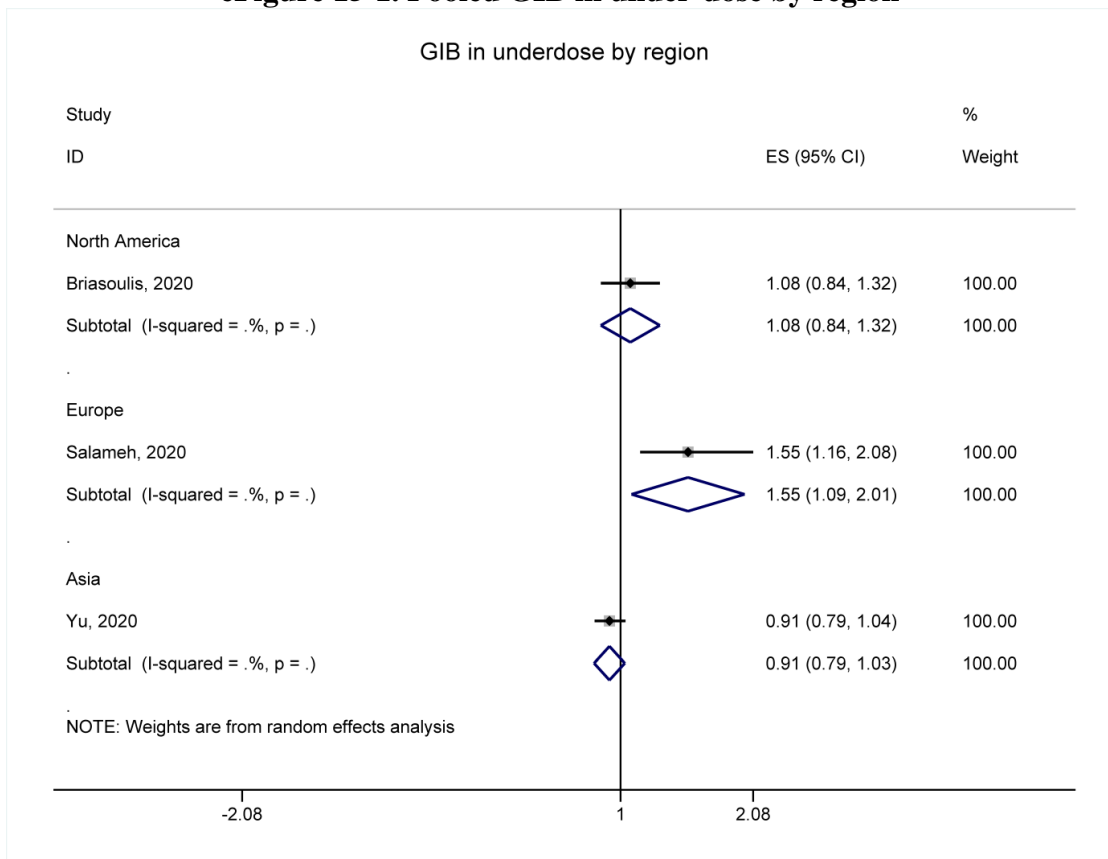

**eFigure 15-2. Pooled GIB in under-dose by region (categorizing Israel as Europe)**

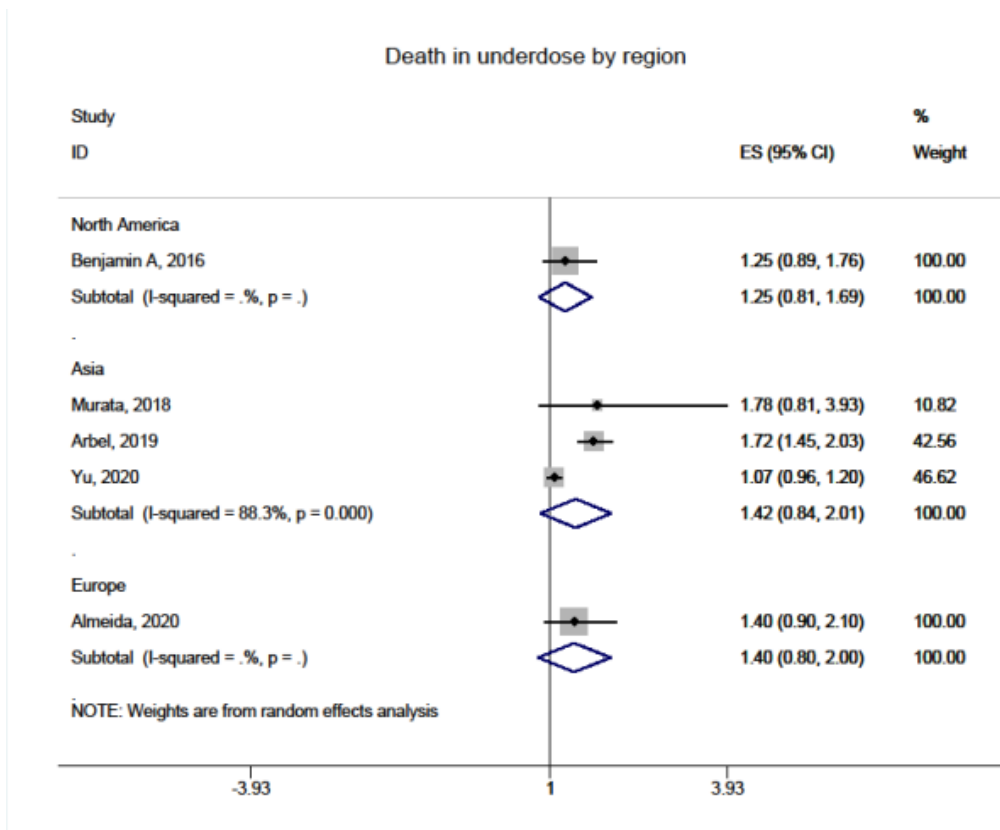

**eFigure 16-1. Pooled Death in under-dose by region**

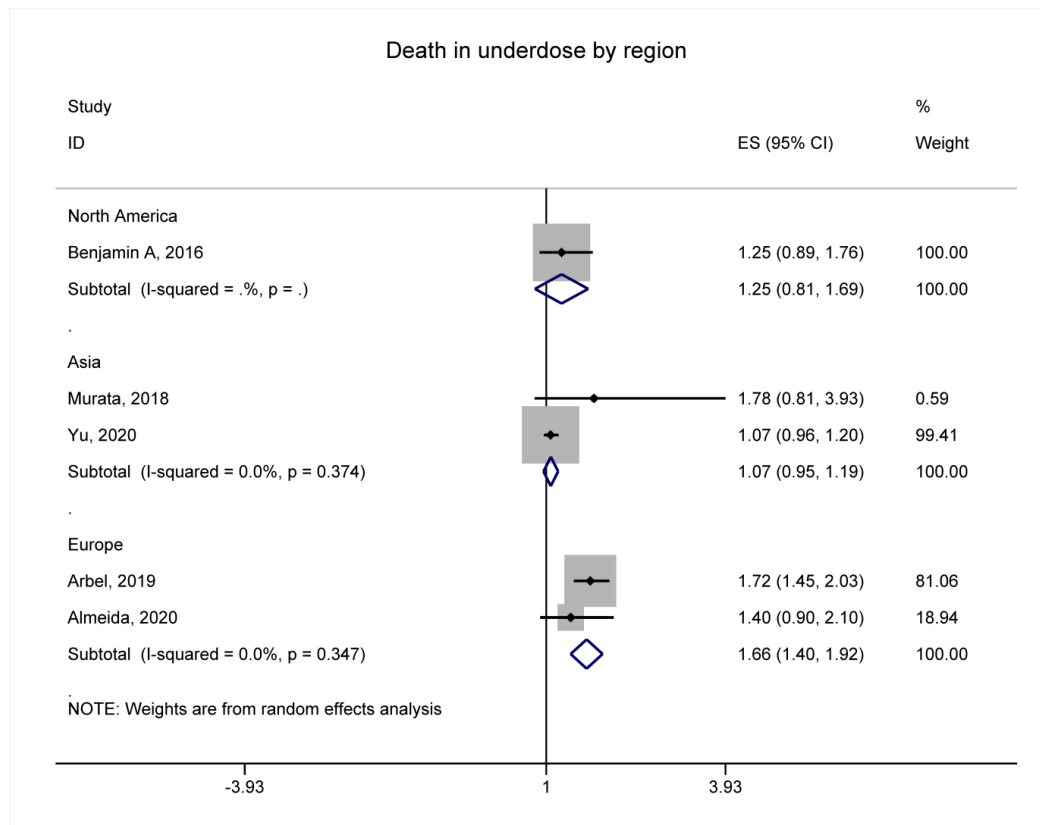

**eFigure 16-2. Pooled Death in under-dose by region (categorizing Israel as Europe)**

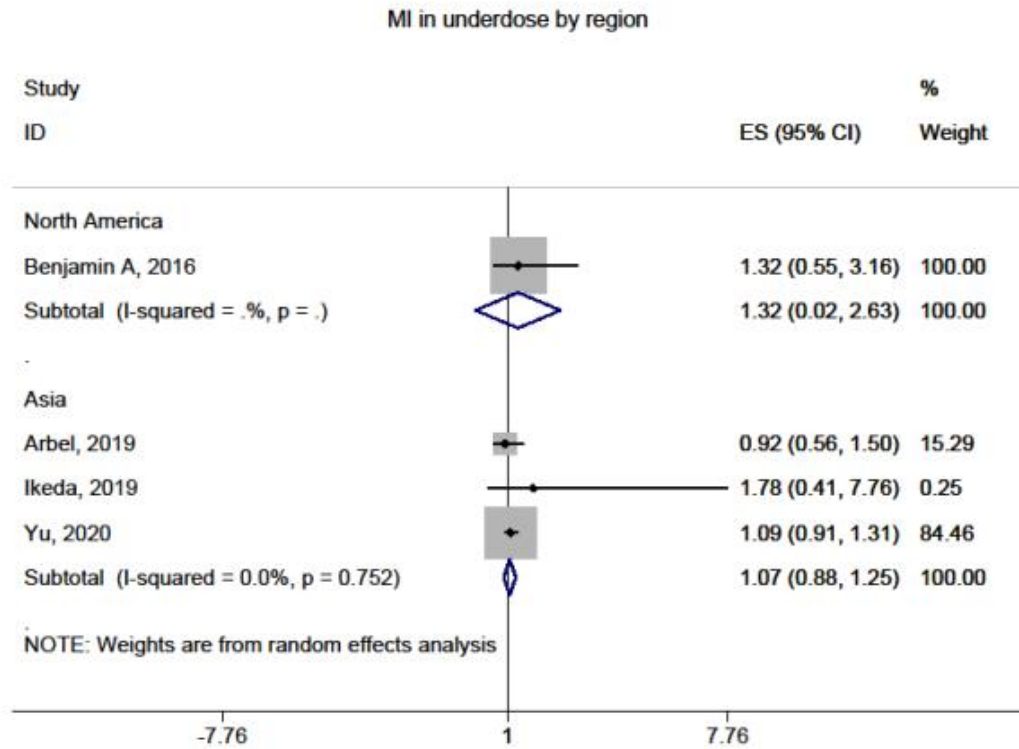

**eFigure 17-1. Pooled MI in under-dose by region**

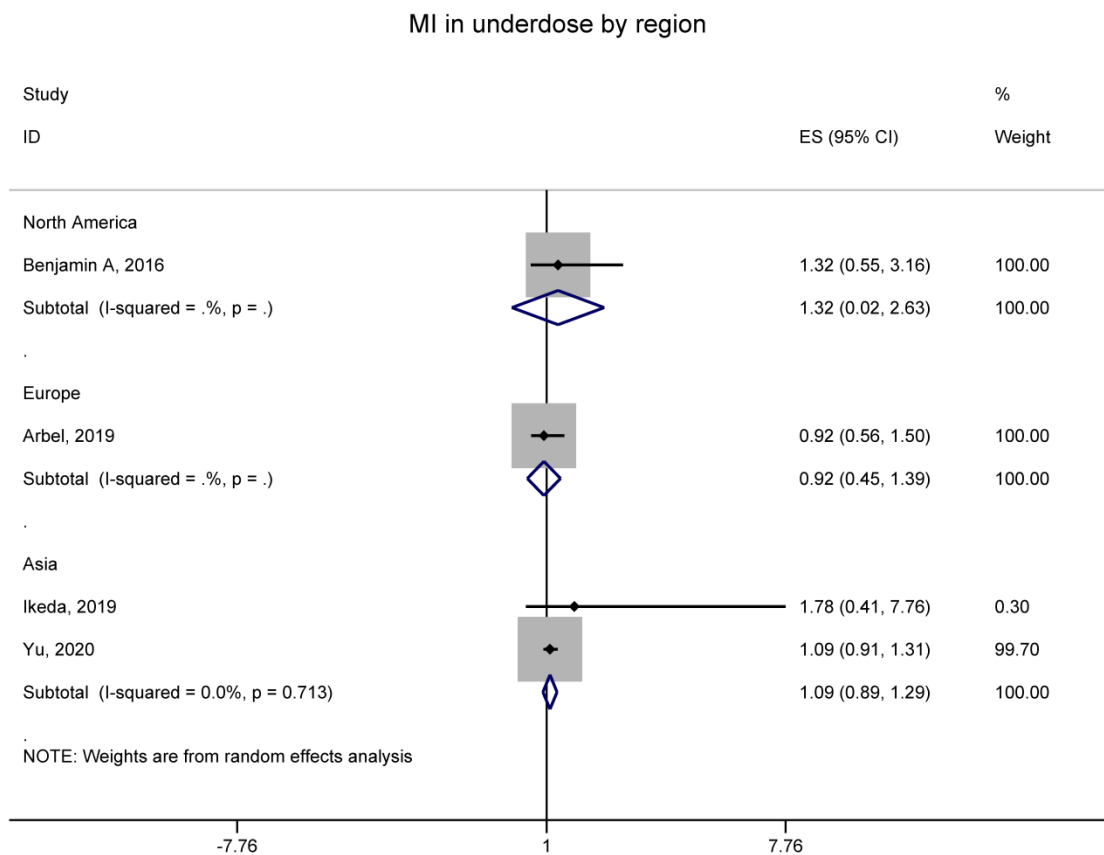

**eFigure 17-2. Pooled MI in under-dose by region (categorizing Israel as Europe)**

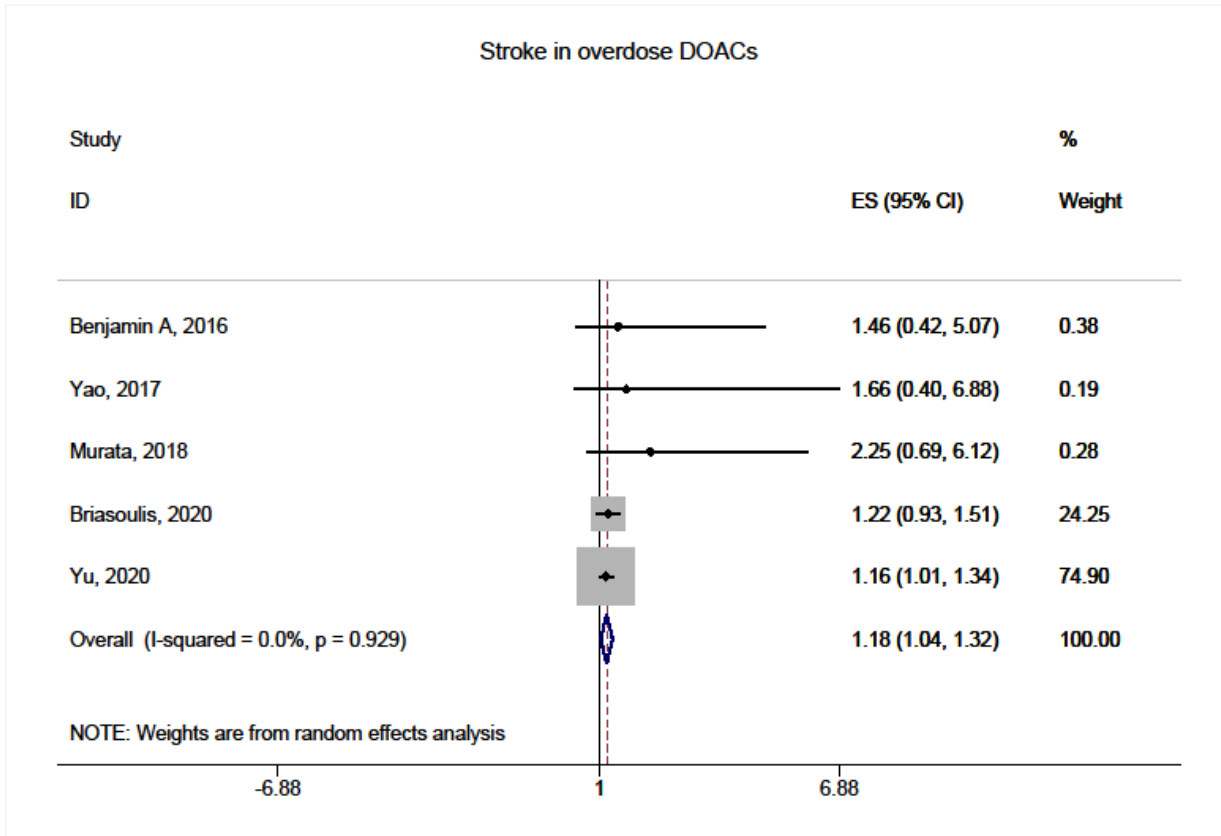

**eFigure 18. Pooled stroke in over-dosing of DOACs**

### Stroke in overdose individual DOAC

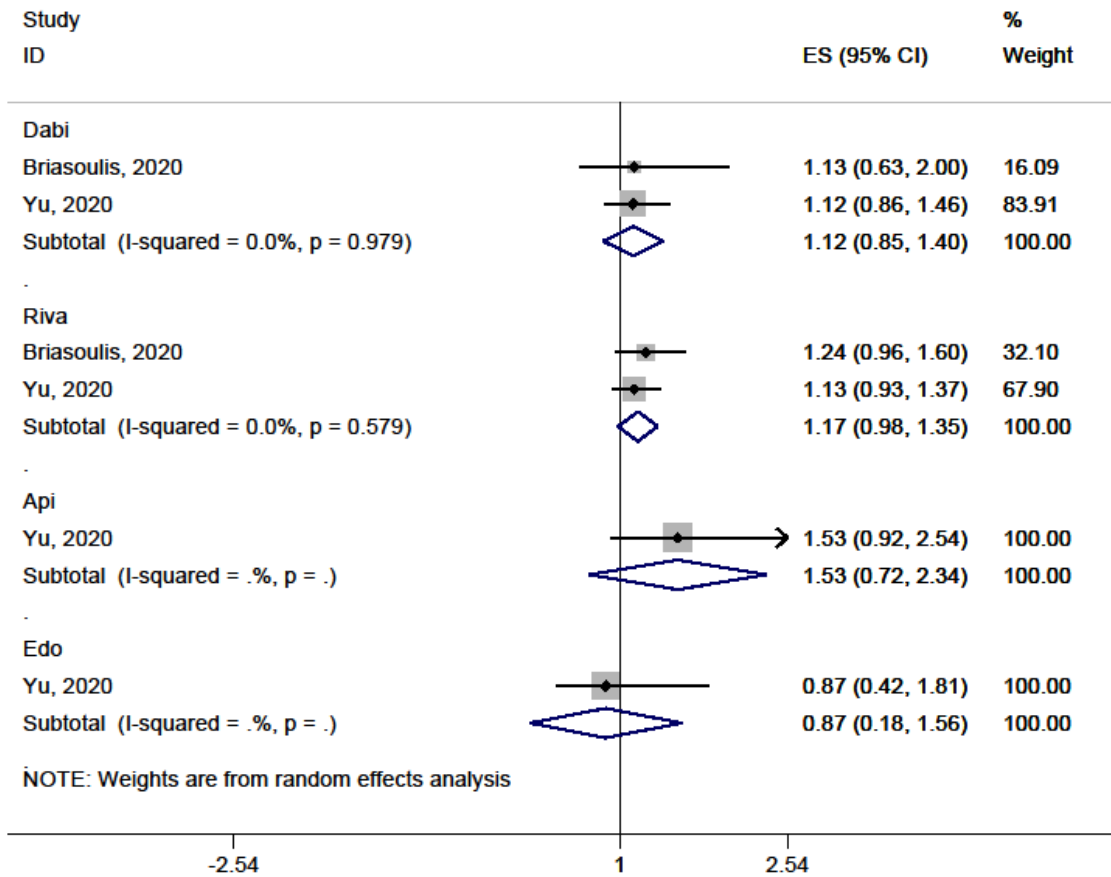

**eFigure 19. Pooled stroke in over-dosing of individual DOAC**

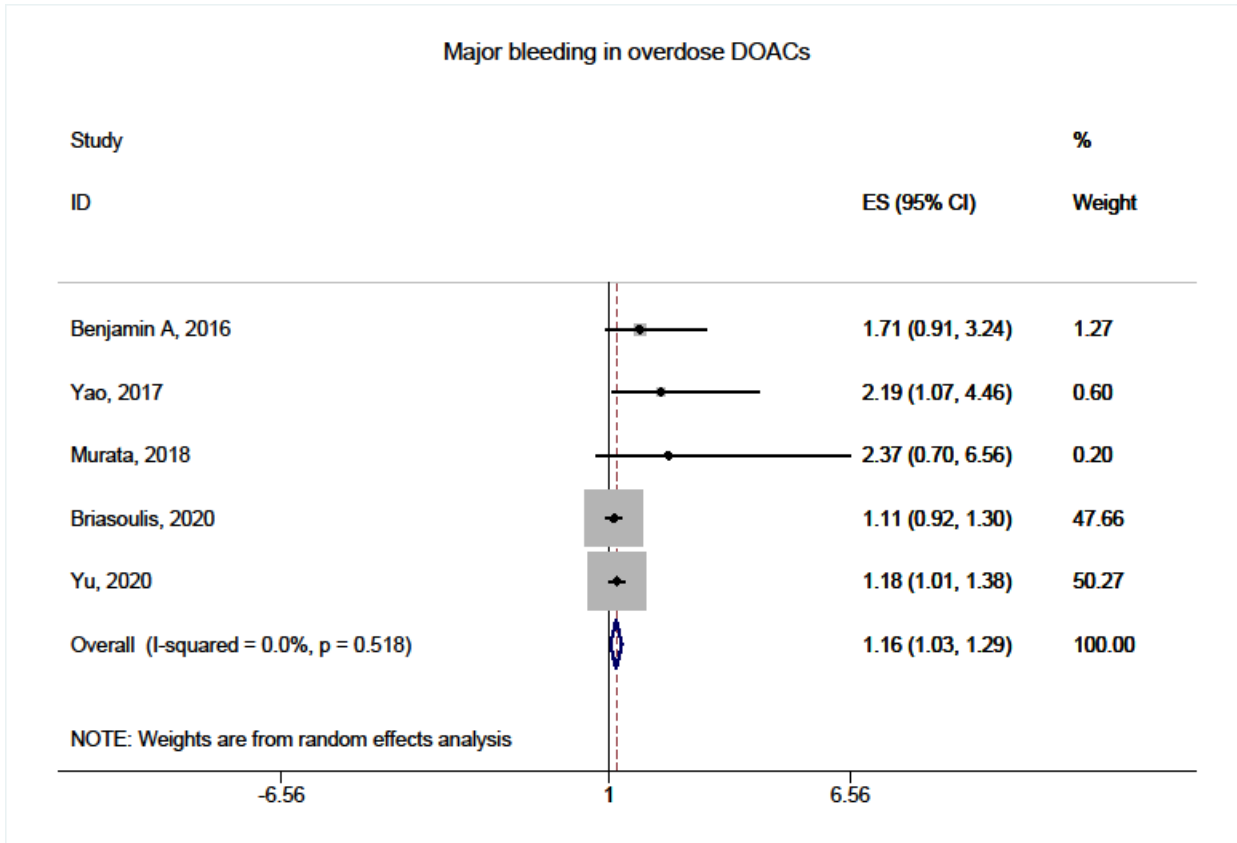

**eFigure 20. Pooled major bleeding in over-dosing of DOACs**



### Major bleeding in overdose individual DOAC

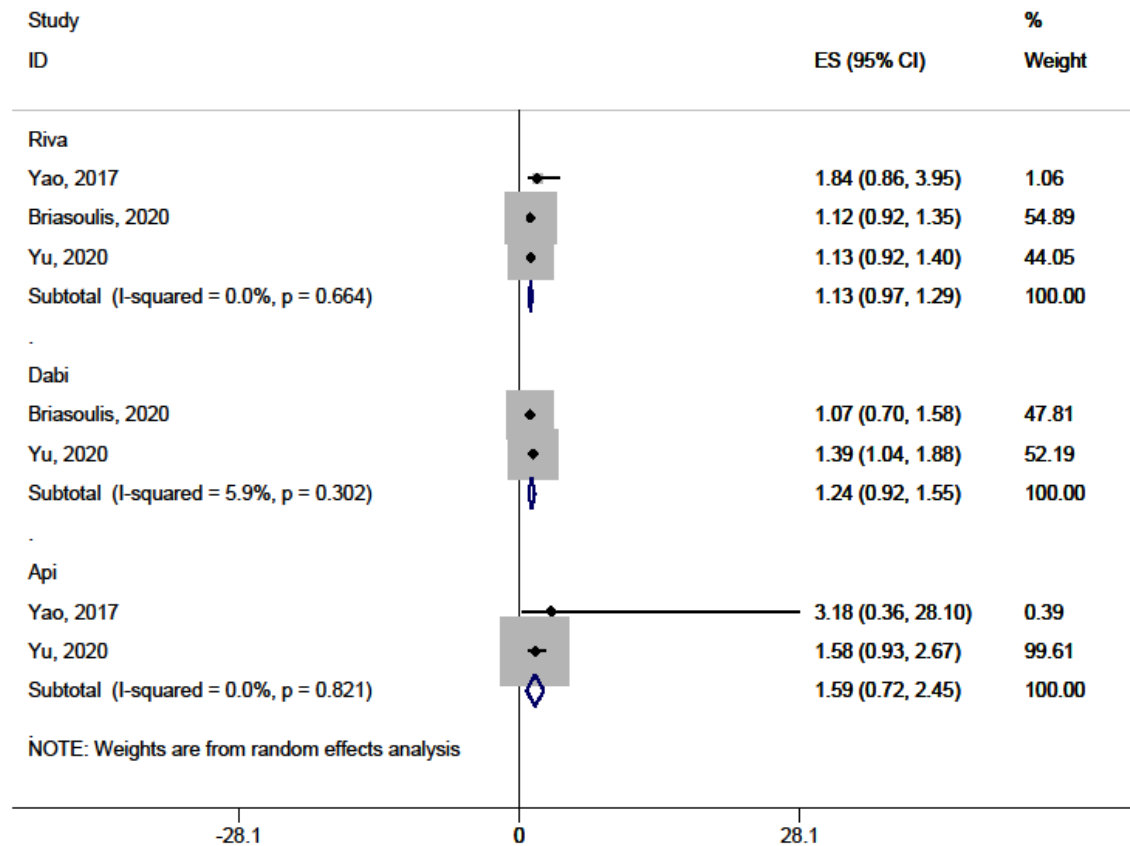

**eFigure 21. Pooled major bleeding in over-dosing of individual DOAC**

ICH in overdose DOACs

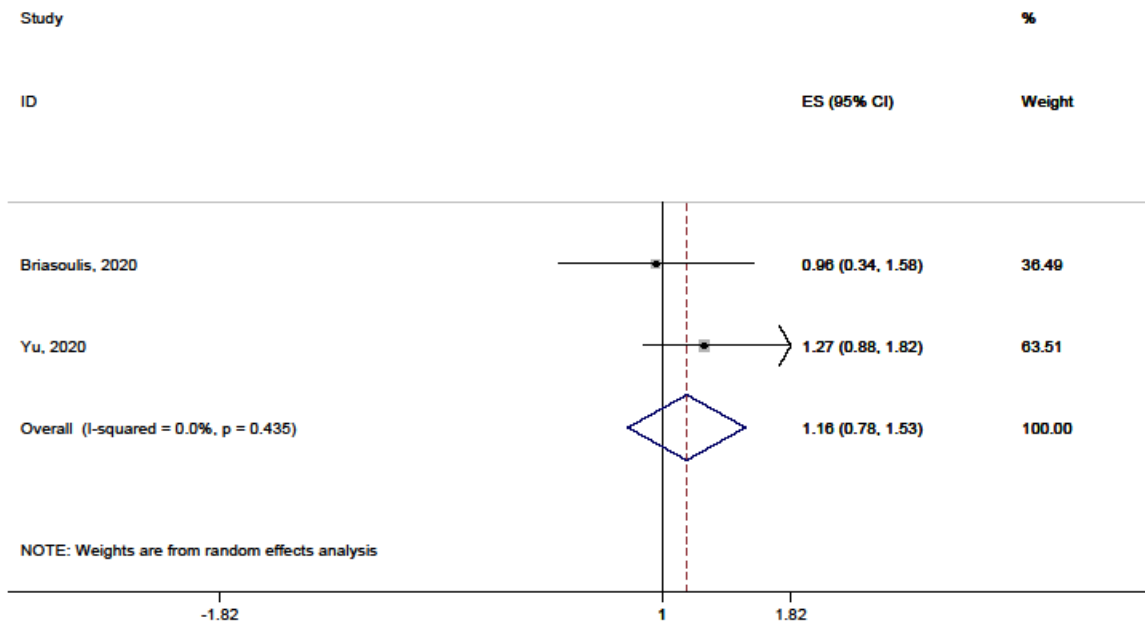

**eFigure 22. Pooled ICH in over-dosing of DOACs**

### ICH in overdose individual DOAC

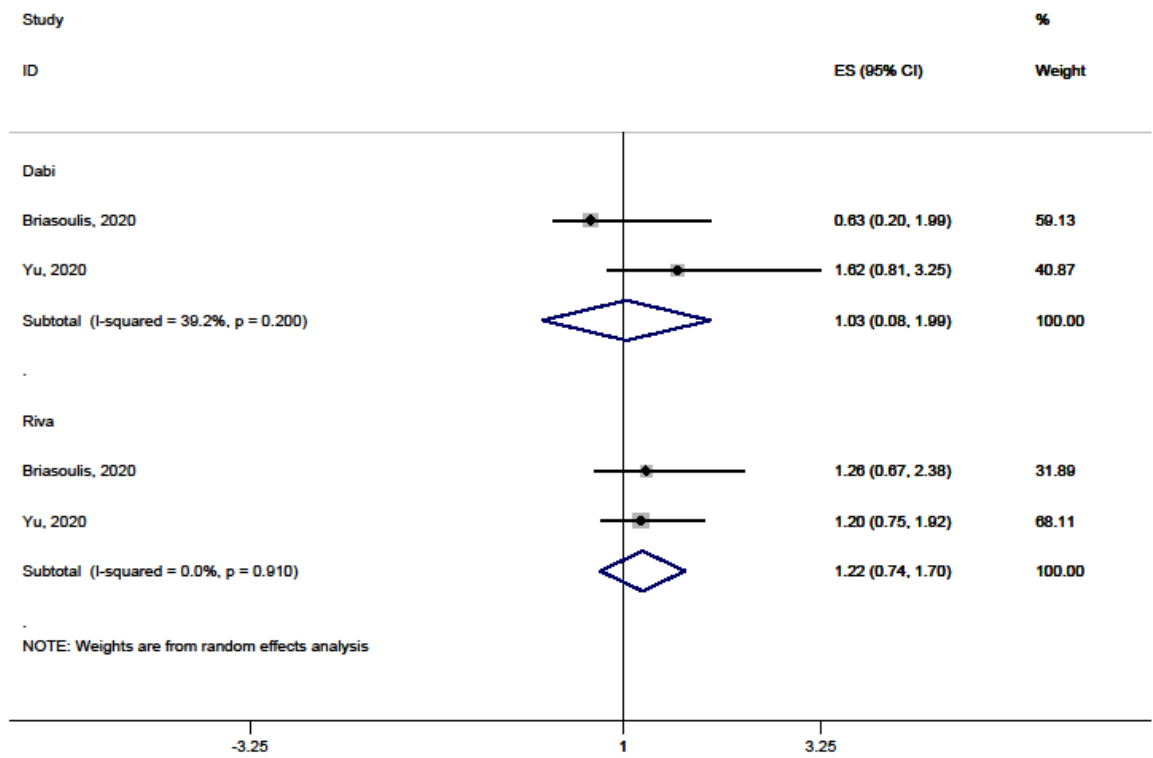

**eFigure 23. Pooled ICH in over-dosing of individual DOAC**

### GIB in overdose DOACs

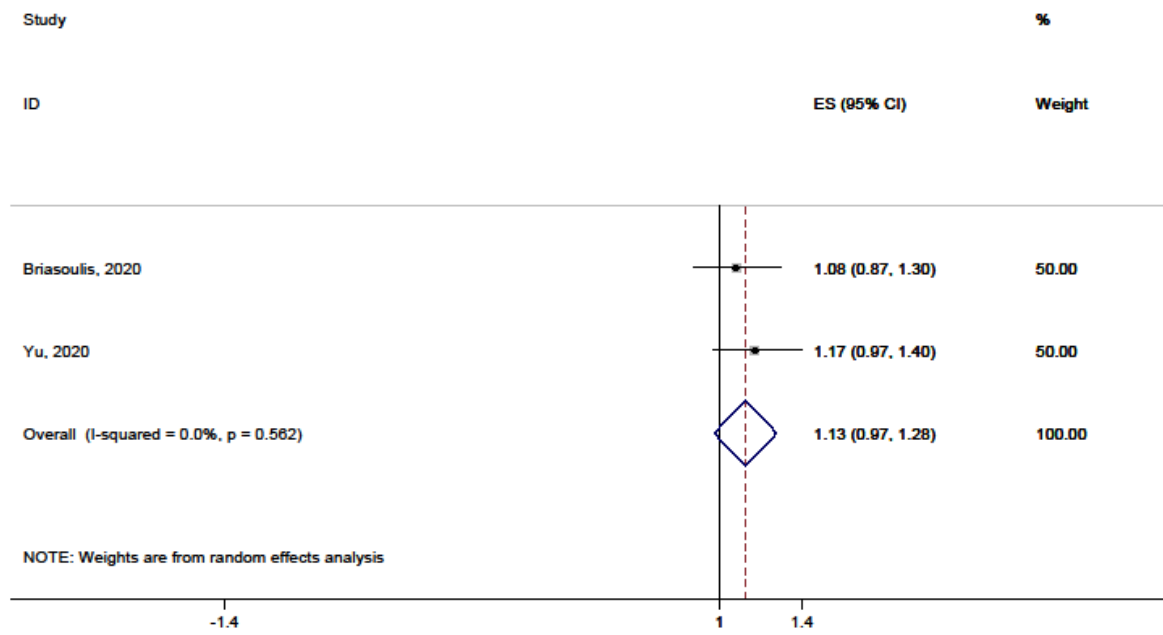

**eFigure 24. Pooled GIB in over-dosing of DOACs**

GIB in overdose individual DOAC

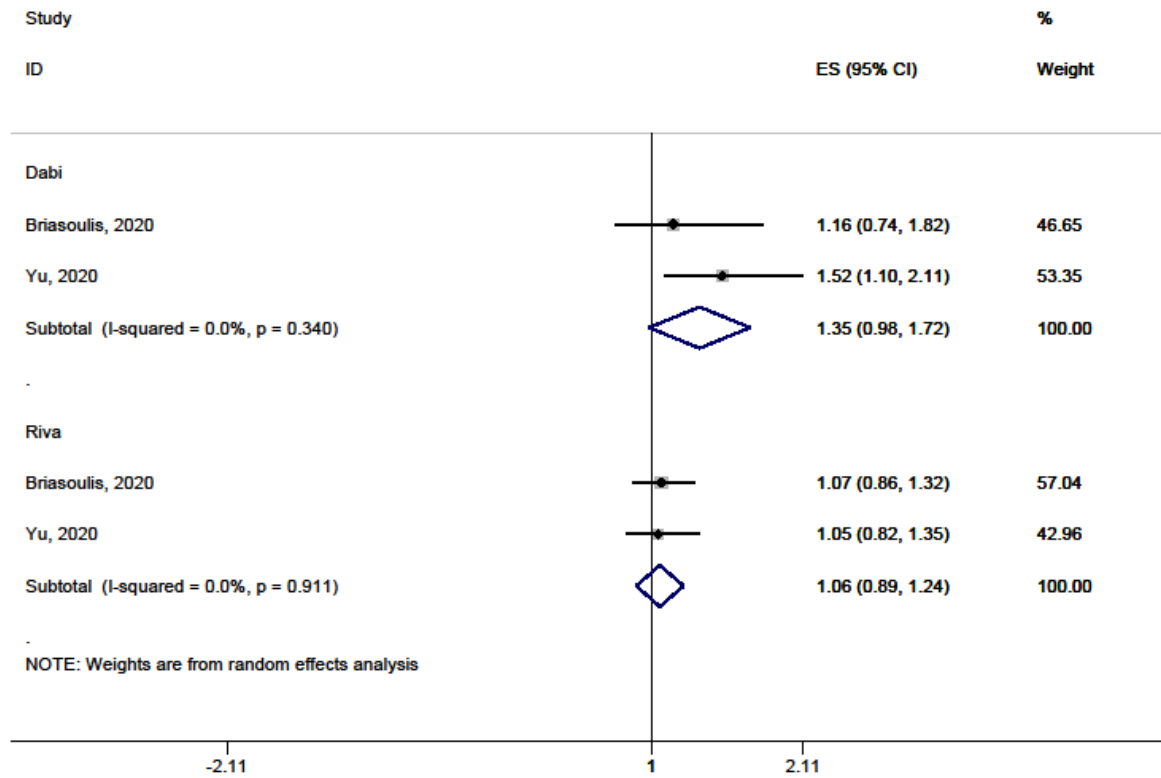

**eFigure 25. Pooled GIB in over-dosing of individual DOAC**

Death in overdose DOACs

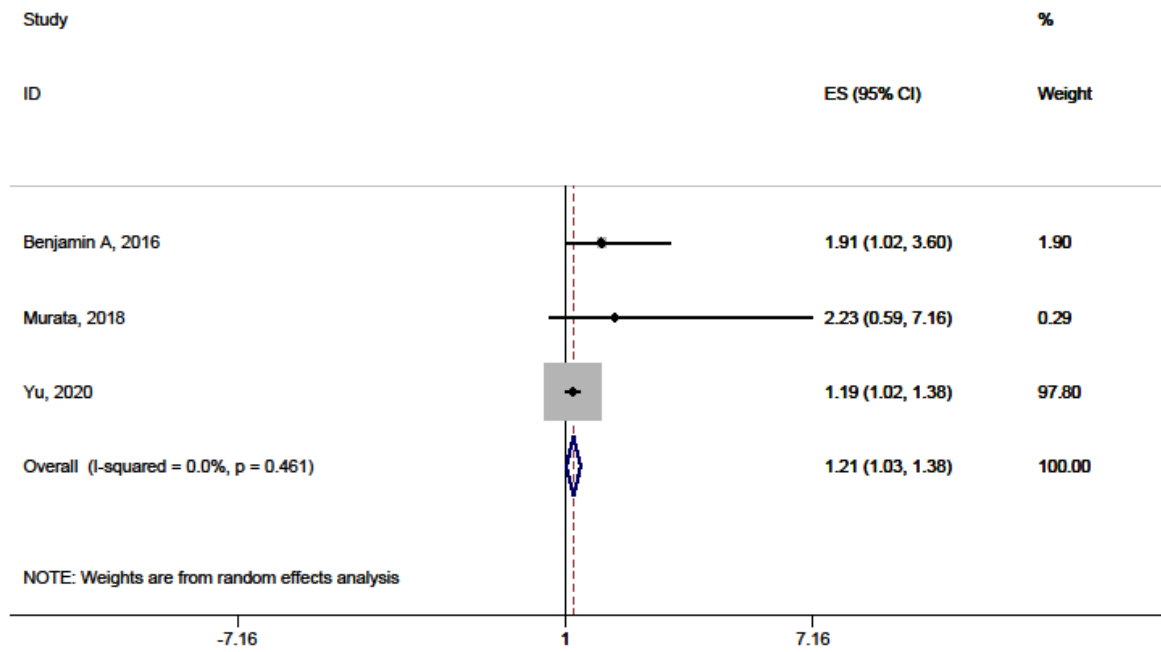

**eFigure 26. Pooled Death in over-dosing of DOACs**



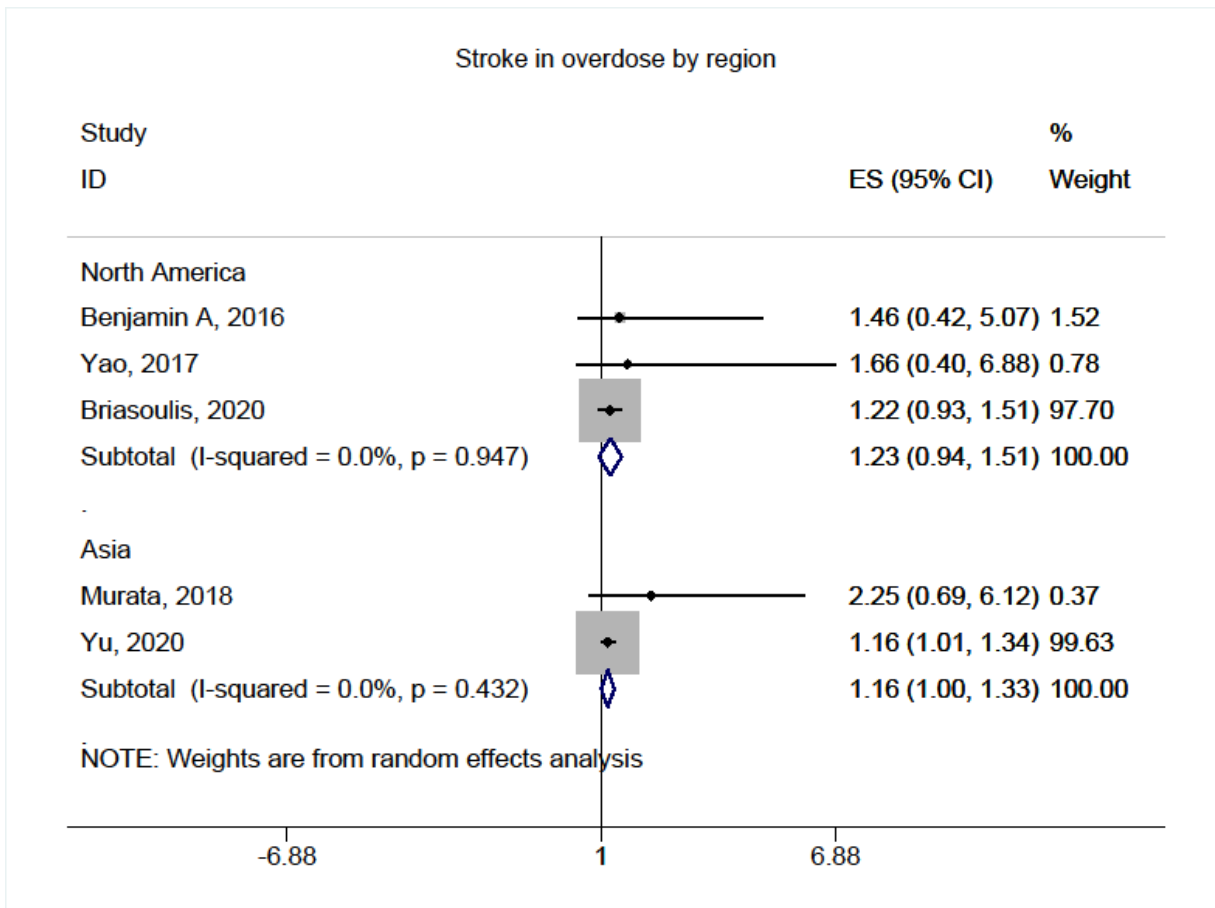

**eFigure 28. Pooled stroke in over-dose by region**



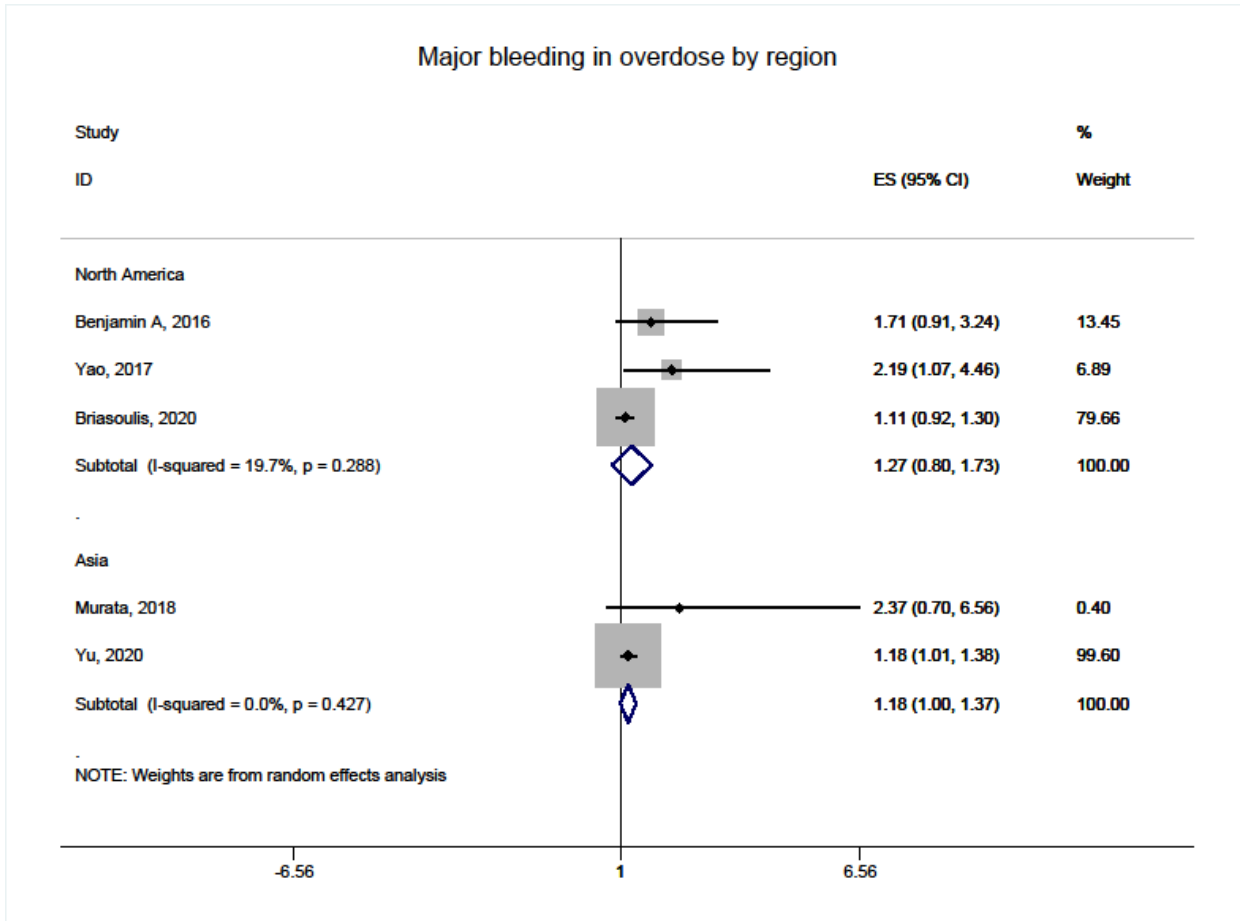

**eFigure 29. Pooled major bleeding in over-dose by region**

### Death in overdose by region

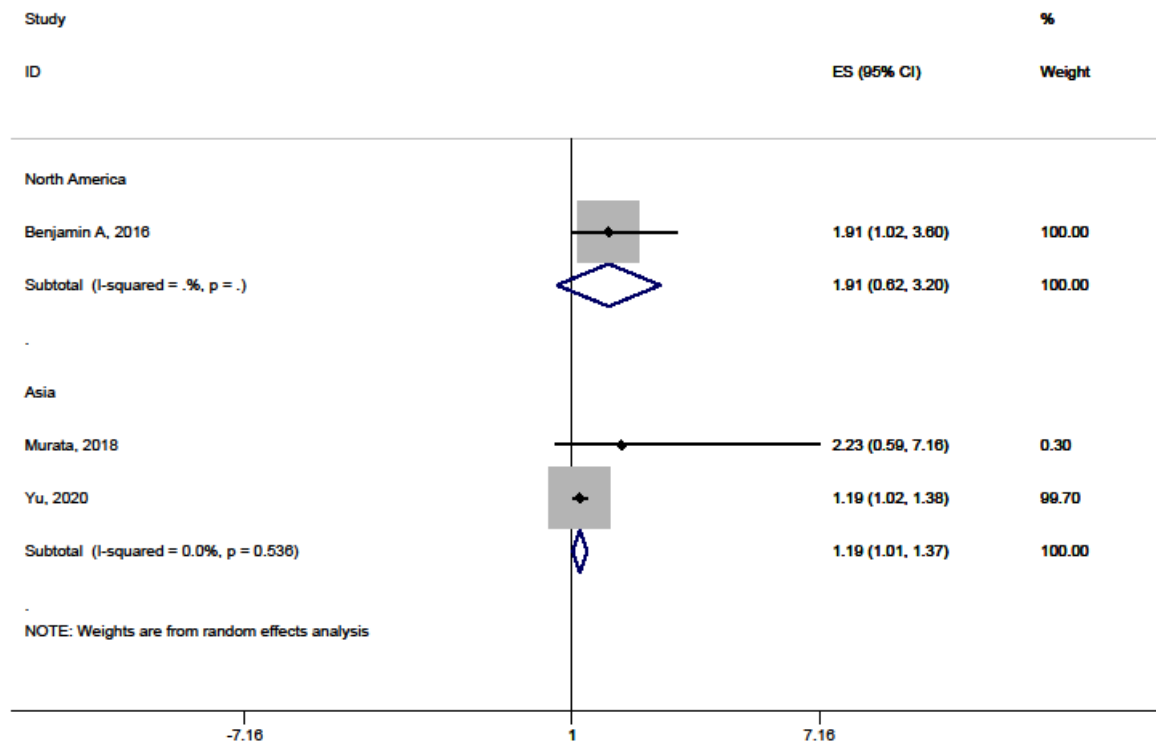

**eFigure 30. Pooled Death in over-dose by region**

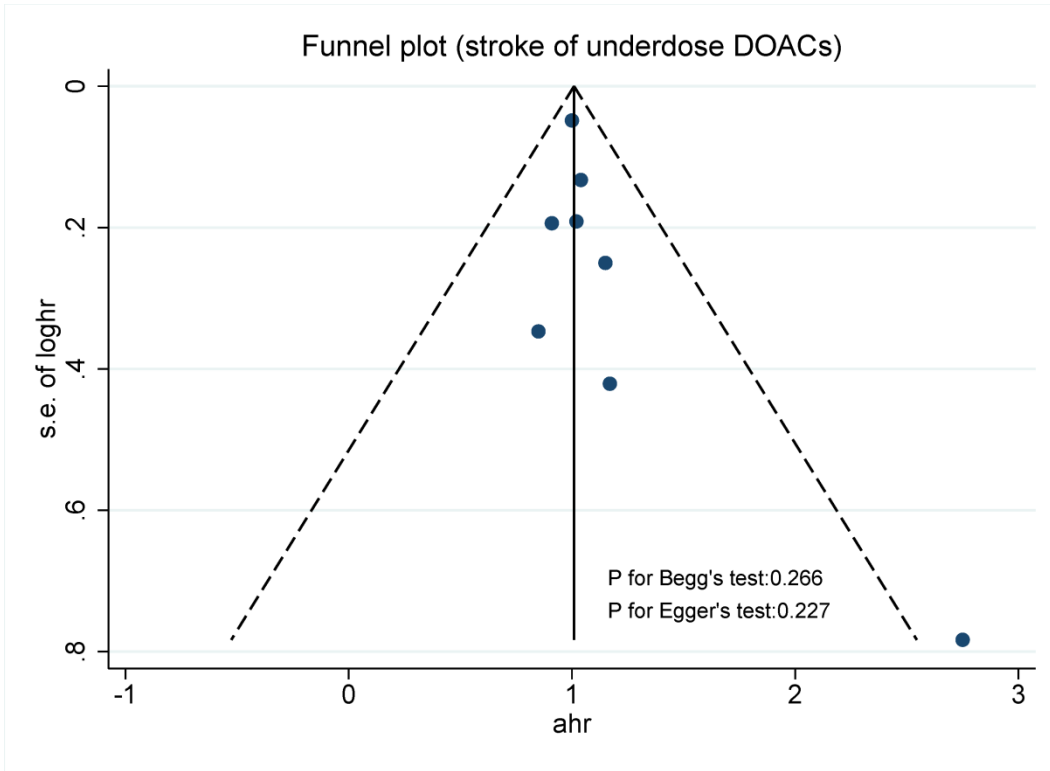

**eFigure 31. Funnel plot (stroke of under-dosing of DOACs)**

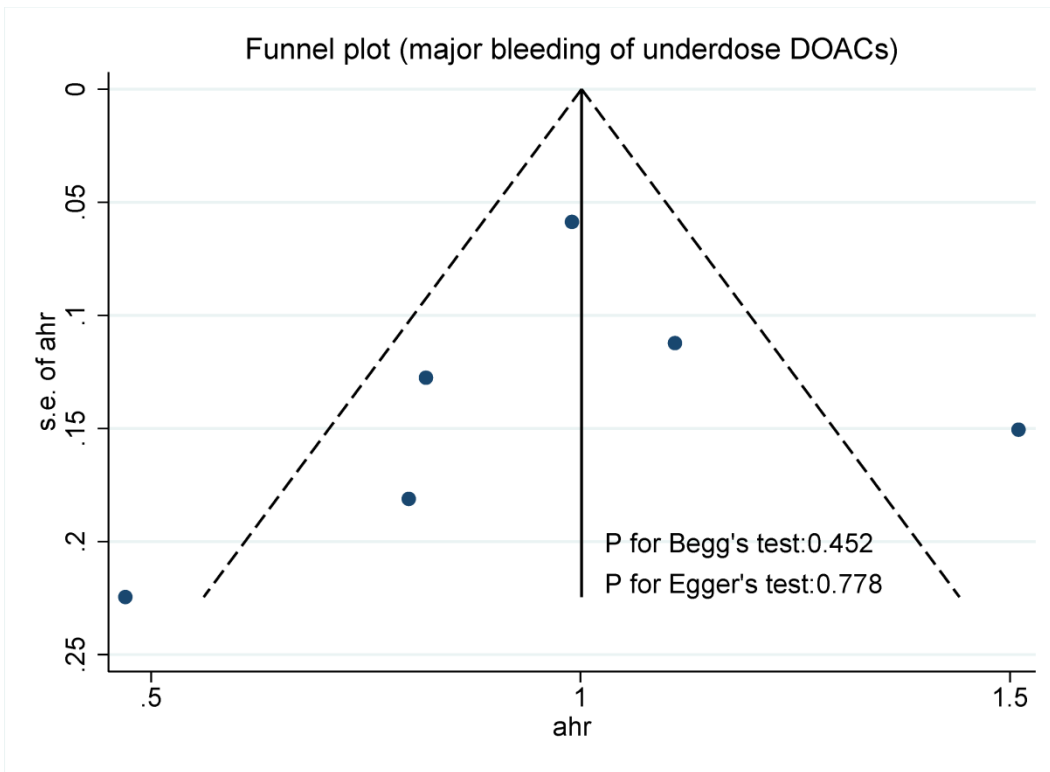

**eFigure 32. Funnel plot (major bleeding of under-dosing of DOACs)**

## References

- Ablefoni, K., and Buchholz, A. (2019). Initial rivaroxaban dosing in patients with atrial fibrillation. 42(10), 873-880. doi: 10.1080/03007995.2019.1647735  
10.1002/clc.23235.
- Alali, N., Mahmoud, M.H., Alharbi, M.A., and Ghazal, S.N. (2019). Appropriateness of dabigatran dosing in patients with nonvalvular atrial fibrillation (NVAf): A retrospective study conducted in a tertiary care university hospital in the eastern province of Saudi Arabia. *J Saudi Heart Assoc* 31(3), 130-134. doi: 10.1111/sdi.12829  
10.1016/j.jsha.2019.05.002.
- Barra, M.E., Fanikos, J., Connors, J.M., Sylvester, K.W., Piazza, G., and Goldhaber, S.Z. (2016). Evaluation of Dose-Reduced Direct Oral Anticoagulant Therapy. *Am J Med* 129(11), 1198-1204. doi: 10.1016/j.amjmed.2016.05.041.
- Basaran, O., Dogan, V., Beton, O., Tekinalp, M., Aykan, A.C., Kalaycioglu, E., et al. (2016). Suboptimal use of non-vitamin K antagonist oral anticoagulants: Results from the RAMSES study. *Medicine (Baltimore)* 95(35), e4672. doi: 10.1097/md.0000000000004672.
- Bell, A.D., Gross, P., Heffernan, M., Deschaintre, Y., Roux, J.F., Purdham, D.M., et al. (2016). Appropriate Use of Antithrombotic Medication in Canadian Patients With Nonvalvular Atrial Fibrillation. *Am J Cardiol* 117(7), 1107-1111. doi: 10.1016/j.amjcard.2015.12.055.
- Briasoulis, A., Gao, Y., Inampudi, C., Alvarez, P., Asleh, R., Chrischilles, E., et al. (2020). Characteristics and outcomes in patients with atrial fibrillation receiving direct oral anticoagulants in off-label doses. *BMC Cardiovasc Disord* 20(1), 42. doi: 10.1055/a-0952-6385  
10.1186/s12872-020-01340-4.
- Bruneau, A., Schwab, C., Anfosso, M., Fernandez, C., and Hindlet, P. (2019). Burden of Inappropriate Prescription of Direct Oral Anticoagulants at Hospital Admission and Discharge in the Elderly: A Prospective Observational Multicenter Study. *Drugs Aging* 36(11), 1047-1055. doi: 10.1007/s40266-019-00710-8.
- Buchholz, A., Ueberham, L., Gorczynska, K., Dinov, B., Hilbert, S., Dagres, N., et al. (2018). Initial apixaban dosing in patients with atrial fibrillation. *Clin Cardiol* 41(5), 671-676. doi: 10.1002/clc.22949.
- Cainzos-Achirica, M., Varas-Lorenzo, C., and Pottegard, A. (2018). Methodological challenges when evaluating potential off-label prescribing of drugs using electronic health care databases: A case study of dabigatran etexilate in Europe. 27(7), 713-723. doi: 10.1002/pds.4416.

- Chan, Y.H., See, L.C., Tu, H.T., Yeh, Y.H., Chang, S.H., Wu, L.S., et al. (2018). Efficacy and Safety of Apixaban, Dabigatran, Rivaroxaban, and Warfarin in Asians With Nonvalvular Atrial Fibrillation. *J Am Heart Assoc* 7(8). doi: 10.1161/jaha.117.008150.
- Chen, Y.T., and Lin, H.J. (2018). Renal Function Estimates and Dosing of Direct Oral Anticoagulants in Stroke Patients with Atrial Fibrillation: An Observational Study. *Acta Neurol Taiwan* 27(2), 39-44.
- Cheng, W.H., Chao, T.F., Lin, Y.J., Chang, S.L., Lo, L.W., Hu, Y.F., et al. (2019). Low-Dose Rivaroxaban and Risks of Adverse Events in Patients With Atrial Fibrillation. *Stroke* 50(9), 2574-2577. doi: 10.1002/joa3.12184  
10.1161/strokeaha.119.025623.
- Chowdhry, U., Jacques, A., Karovitch, A., Giguere, P., and Nguyen, M.L. (2016). Appropriateness of Dabigatran and Rivaroxaban Prescribing for Hospital Inpatients. *Can J Hosp Pharm* 69(3), 194-201. doi: 10.4212/cjhp.v69i3.1555.
- Connolly, S.J., Ezekowitz, M.D., Yusuf, S., Eikelboom, J., Oldgren, J., Parekh, A., et al. (2009). Dabigatran versus warfarin in patients with atrial fibrillation. *N Engl J Med* 361(12), 1139-1151. doi: 10.1056/NEJMoa0905561.
- De Caterina, R., Kelly, P., Monteiro, P., Deharo, J.C., de Asmundis, C., Lopez-de-Sa, E., et al. (2019). Characteristics of patients initiated on edoxaban in Europe: baseline data from edoxaban treatment in routine clinical practice for patients with atrial fibrillation (AF) in Europe (ETNA-AF-Europe). *19(1)*, 165. doi: 10.1186/s12872-019-1144-x.
- Draper, E., Parkhurst, B., Carley, B., Krueger, K., Larson, T., and Griesbach, S. (2017). Comparison of Prescribing Practices with Direct Acting Oral Anticoagulant Protocols. *Am J Cardiovasc Drugs* 17(6), 475-479. doi: 10.1007/s40256-017-0243-2.
- Eschler, C.M., Woitok, B.K., Funk, G.C., Walter, P., Maier, V., Exadaktylos, A.K., et al. (2019). Oral Anticoagulation in Patients in the Emergency Department: High Rates of Off-Label Doses, No Difference in Bleeding Rates. *Am J Med*. doi: 10.1016/j.amjmed.2019.09.026.
- Falissard, B., Picard, F., Mahe, I., Hanon, O., Touze, E., Danchin, N., et al. (2019). Apixaban for prevention of stroke and systemic embolism in patients with non-valvular atrial fibrillation in France: The PAROS cross-sectional study of routine clinical practice. *JAMA Cardiol* 112(6-7), 400-409. doi: 10.1001/jamacardio.2019.1049  
10.1016/j.acvd.2019.02.003.
- Galaune, V., Gumbreviciute, M., and Gustafson, W.L. (2019). Real-world study of direct oral anticoagulant dosing patterns in patients with atrial fibrillation. *Medicina (Kaunas)* 17(4), 1709. doi: 10.3390/medicina56010013.

- Garcia Rodriguez, L.A., Martin-Perez, M., Vora, P., Roberts, L., Balabanova, Y., Brobert, G., et al. (2019). Appropriateness of initial dose of non-vitamin K antagonist oral anticoagulants in patients with non-valvular atrial fibrillation in the UK. *Intern Med J* 9(9), e031341. doi: 10.1111/imj.14640  
10.1136/bmjopen-2019-031341.
- Gibson, C.M., Smith, C.B., Davis, S., and Scalse, M.J. (2018). Assessment of Apixaban Prescribing Patterns for Nonvalvular Atrial Fibrillation in Hospitalized Patients. *Ann Pharmacother* 52(1), 54-59. doi: 10.1177/1060028017726795.
- Hirsh Raccach, B., Rottenstreich, A., Zacks, N., Matok, I., Danenberg, H.D., Pollak, A., et al. (2019). Appropriateness of direct oral anticoagulant dosing and its relation to drug levels in atrial fibrillation patients. *47(4)*, 550-557. doi: 10.1161/circresaha.118.313155  
10.1007/s11239-019-01815-y.
- Howerton, M.A., Suhrie, E.M., Gennari, A.S., Jones, N., and Ruby, C.M. (2019). Evaluation of Direct Oral Anticoagulant Dosing and Monitoring in Two Geriatric Outpatient Clinics. *Sr Care Pharm* 34(3), 192-205.
- Hussain, S., Gebran, N., Hussain, K., and Soliman, K. (2013). Drug use evaluation of dabigatran in a tertiary care hospital in United Arab Emirates. *European Journal of Hospital Pharmacy* 20(2), 106-109. doi: 10.1136/ejhpharm-2012-000169.
- Ikeda, T., Ogawa, S., Kitazono, T., Nakagawara, J., Minematsu, K., Miyamoto, S., et al. (2019). Outcomes associated with under-dosing of rivaroxaban for management of non-valvular atrial fibrillation in real-world Japanese clinical settings. *J Thromb Thrombolysis* 48(4), 653-660. doi: 10.1007/s11239-019-01934-6.
- Inoue, H., Umeyama, M., Yamada, T., Hashimoto, H., Komoto, A., and Yasaka, M. (2020). Safety and effectiveness of reduced-dose apixaban in Japanese patients with nonvalvular atrial fibrillation in clinical practice: A sub-analysis of the STANDARD study. *J Cardiol* 75(2), 208-215. doi: 10.1016/j.jjcc.2019.07.007.
- Jacobs, M.S., van Hulst, M., Campmans, Z., and Tieleman, R.G. (2019). Inappropriate non-vitamin K antagonist oral anticoagulants prescriptions: be cautious with dose reductions. *Neth Heart J* 27(7-8), 371-377. doi: 10.1007/s12471-019-1267-9.
- Jones, A.E., Witt, D.M., and Yagi, N. (2020). Creatinine clearance and inappropriate dose of rivaroxaban in Japanese patients with non-valvular atrial fibrillation. *J Thromb Thrombolysis* 35(1), 110-117. doi: 10.1007/s11239-019-01904-y  
10.1007/s00380-019-01457-3.
- Kakkar, A.K., Mueller, I., Bassand, J.P., Fitzmaurice, D.A., Goldhaber, S.Z., Goto, S., et al. (2013). Risk profiles and antithrombotic treatment of patients newly diagnosed with atrial fibrillation at risk of

- stroke: perspectives from the international, observational, prospective GARFIELD registry. *PLoS One* 8(5), e63479. doi: 10.1371/journal.pone.0063479.
- Kartas, A., Samaras, A., Vasdeki, D., Dividis, G., Fotos, G., Paschou, E., et al. (2019). Flaws in Anticoagulation Strategies in Patients With Atrial Fibrillation at Hospital Discharge. *J Cardiovasc Pharmacol Ther* 24(3), 225-232. doi: 10.1177/1074248418821712.
- Kato, Y., Hayashi, T., Tanahashi, N., and Takao, M. (2018). The Dose of Direct Oral Anticoagulants and Stroke Severity in Patients with Acute Ischemic Stroke and Nonvalvular Atrial Fibrillation. *J Stroke Cerebrovasc Dis* 27(6), 1490-1496. doi: 10.1016/j.jstrokecerebrovasdis.2017.12.038.
- Khan, F., Huang, H., and Datta, Y.H. (2016). Direct oral anticoagulant use and the incidence of bleeding in the very elderly with atrial fibrillation. *J Thromb Thrombolysis* 42(4), 573-578. doi: 10.1007/s11239-016-1410-z.
- Kim, J.Y., Kim, S.H., Myong, J.P., Kim, Y.R., Kim, T.S., Kim, J.H., et al. (2019). Outcomes of Direct Oral Anticoagulants in Patients With Mitral Stenosis. *PLoS One* 14(10), 1123-1131. doi: 10.1371/journal.pone.0213517
- 10.1016/j.jacc.2018.12.047.
- Lavoie, K., Turgeon, M.H., Brais, C., Larochelle, J., Blais, L., Farand, P., et al. (2016). Inappropriate dosing of direct oral anticoagulants in patients with atrial fibrillation. *J Atr Fibrillation* 9(4), 1478. doi: 10.4022/jafib.1478.
- Lee, K.N., and Choi, J.I. (2020). Effectiveness and Safety of Off-label Dosing of Non-vitamin K Antagonist Anticoagulant for Atrial Fibrillation in Asian Patients. 10(1), 1801. doi: 10.1038/s41598-020-58665-5.
- Lee, S.R., Choi, E.K., Han, K.D., Jung, J.H., Oh, S., and Lip, G.Y.H. (2019). Optimal Rivaroxaban Dose in Asian Patients With Atrial Fibrillation and Normal or Mildly Impaired Renal Function. *Stroke* 50(5), 1140-1148. doi: 10.1161/strokeaha.118.024210.
- Lee, S.R., and Lee, Y.S. (2019). Label Adherence for Non-Vitamin K Antagonist Oral Anticoagulants in a Prospective Cohort of Asian Patients with Atrial Fibrillation. 60(3), 277-284. doi: 10.3349/ymj.2019.60.3.277.
- Leef, G.C., Perino, A.C., Askari, M., Fan, J., Ho, P.M., Olivier, C.B., et al. (2019). Appropriateness of Direct Oral Anticoagulant Dosing in Patients With Atrial Fibrillation: Insights From the Veterans Health Administration. *J Pharm Pract*, 897190019828270. doi: 10.5603/KP.a2019.0033
- 10.1177/0897190019828270.
- McAlister, F.A., Garrison, S., Kosowan, L., Ezekowitz, J.A., and Singer, A. (2018). Use of Direct Oral Anticoagulants in Canadian Primary Care Practice 2010-2015: A Cohort Study From the Canadian



- Primary Care Sentinel Surveillance Network. *J Am Heart Assoc* 7(3). doi: 10.1161/jaha.117.007603.
- Morris, J.K., MacCallum, P., Arbel, R., Sergienko, R., Hammerman, A., Greenberg-Dotan, S., et al. (2019). Effectiveness and Safety of Off-Label Dose-Reduced Direct Oral Anticoagulants in Atrial Fibrillation. *Br J Haematol* 132(7), 847-855.e843. doi: 10.1111/bjh.15808  
10.1016/j.amjmed.2019.01.025.
- Moudallel, S., Steurbaut, S., Cornu, P., and Dupont, A. (2018). Appropriateness of DOAC Prescribing Before and During Hospital Admission and Analysis of Determinants for Inappropriate Prescribing. *Front Pharmacol* 9, 1220. doi: 10.3389/fphar.2018.01220.
- Murata, N., Okumura, Y., Yokoyama, K., Matsumoto, N., Tachibana, E., Kuronuma, K., et al. (2019). Clinical Outcomes of Off-Label Dosing of Direct Oral Anticoagulant Therapy Among Japanese Patients With Atrial Fibrillation Identified From the SAKURA AF Registry. *Circ J* 83(4), 727-735. doi: 10.2174/1570161117666190206230516  
10.1253/circj.CJ-18-0991.
- Navarro-Almenzar, B., Cerezo-Manchado, J.J., Caro-Martinez, C., Garcia-Candel, F., Flores Blanco, P.J., Ruiz, G.E., et al. (2019). Real-life behaviour of direct oral anticoagulants in a Spanish cohort with non-valvular atrial fibrillation: Refase Registry. *J Cardiol* 35(12), 2035-2041. doi: 10.1016/j.jjcc.2019.06.002  
10.1080/03007995.2019.1647735.
- Okumura, Y., Yokoyama, K., Matsumoto, N., Tachibana, E., Kuronuma, K., Oiwa, K., et al. (2017). Current use of direct oral anticoagulants for atrial fibrillation in Japan: Findings from the SAKURA AF Registry. *Journal of Arrhythmia* 33(4), 289-296. doi: 10.1016/j.joa.2016.11.003.
- Paciaroni, M., Agnelli, G., Caso, V., Silvestrelli, G., Seiffge, D.J., Engelter, S., et al. (2019). Causes and Risk Factors of Cerebral Ischemic Events in Patients With Atrial Fibrillation Treated With Non-Vitamin K Antagonist Oral Anticoagulants for Stroke Prevention. *Stroke* 50(8), 2168-2174. doi: 10.1161/strokeaha.119.025350.
- Patel, M.R., Mahaffey, K.W., Garg, J., Pan, G., Singer, D.E., Hacke, W., et al. (2011). Rivaroxaban versus warfarin in nonvalvular atrial fibrillation. *N Engl J Med* 365(10), 883-891. doi: 10.1056/NEJMoa1009638.
- Pisters, R., van Vugt, S.P.G., Brouwer, M.A., Elvan, A., Ten Holt, W.L., Zwart, P.A.G., et al. (2017). Real-life use of Rivaroxaban in the Netherlands: data from the Xarelto for Prevention of Stroke in Patients with Atrial Fibrillation (XANTUS) registry. *Neth Heart J* 25(10), 551-558. doi: 10.1007/s12471-017-1009-9.

- Sato, T., Aizawa, Y., Fuse, K., Fujita, S., Ikeda, Y., Kitazawa, H., et al. (2018). The Comparison of Inappropriate-Low-Doses Use among 4 Direct Oral Anticoagulants in Patients with Atrial Fibrillation: From the Database of a Single-Center Registry. *J Stroke Cerebrovasc Dis* 27(11), 3280-3288. doi: 10.1016/j.jstrokecerebrovasdis.2018.07.028.
- Saunders, J.A., Gustafson, W.L., and Vazquez, S.R. (2019). Real-world assessment of off-label direct oral anticoagulant dosing for venous thromboembolism. 48(3), 506-510. doi: 10.1007/s11239-019-01904-y.
- Schwartz, J., Merrill, S., de Leon, N., Thompson, A., and Fang, M. (2017). Dosing Accuracy of Direct Oral Anticoagulants in an Academic Medical Center. *Clin Cardiol* 12(7), 544-550. doi: 10.1002/clc.22746
- 10.12788/jhm.2769.
- Shrestha, S., Baser, O., and Kwong, W.J. (2018). Effect of Renal Function on Dosing of Non-Vitamin K Antagonist Direct Oral Anticoagulants Among Patients With Nonvalvular Atrial Fibrillation. *Ann Pharmacother* 52(2), 147-153. doi: 10.1177/1060028017728295.
- Sieg, A., and Nappi, J. (2015). Evaluation of dosing practices of rivaroxaban and dabigatran. *Journal of Pharmacy Technology* 31(4), 149-154. doi: 10.1177/8755122514567923.
- Steinberg, B.A., Shrader, P., Thomas, L., Ansell, J., Fonarow, G.C., Gersh, B.J., et al. (2016). Off-Label Dosing of Non-Vitamin K Antagonist Oral Anticoagulants and Adverse Outcomes: The ORBIT-AF II Registry. *J Am Coll Cardiol* 68(24), 2597-2604. doi: 10.1016/j.jacc.2016.09.966.
- Suwa, M., Morii, I., and Kino, M. (2019). Rivaroxaban or Apixaban for Non-Valvular Atrial Fibrillation-Efficacy and Safety of Off-Label Under-Dosing According to Plasma Concentration. *Circ J* 83(5), 991-999. doi: 10.1253/circj.CJ-18-1282.
- Tellor, K.B., Patel, S., Armbruster, A.L., and Daly, M.W. (2015). Evaluation of the appropriateness of dosing, indication and safety of rivaroxaban in a community hospital. *J Clin Pharm Ther* 40(4), 447-451. doi: 10.1111/jcpt.12288.
- Tellor, K.B., Wang, M., Green, M.S., and Armbruster, A.L. (2017). Evaluation of Apixaban for the Treatment of Nonvalvular Atrial Fibrillation with Regard to Dosing and Safety in a Community Hospital. *Journal of Pharmacy Technology* 33(4), 140-145. doi: 10.1177/8755122517706423.
- Umei, M., Kishi, M., Sato, T., Shindo, A., Toyoda, M., Yokoyama, M., et al. (2017). Indications for suboptimal low-dose direct oral anticoagulants for non-valvular atrial fibrillation patients. *J Arrhythm* 33(5), 475-482. doi: 10.1016/j.joa.2017.05.008.
- Vinter, N., Linder, M., Andersen, M., Pedersen, A.B., Madsen, M., Schachterle, S.E., et al. (2019). Classification and characteristics of on-label and off-label apixaban use in Denmark and Sweden. *Pharmacoepidemiol Drug Saf* 28(6), 867-878. doi: 10.1002/pds.4778.

- Viprey, M., Jeannin, R., Piriou, V., Chevalier, P., Michel, C., Aulagner, G., et al. 2016. Prevalence of drug-related problems associated with direct oral anticoagulants in hospitalized patients: a multicenter, cross-sectional study. *Journal of clinical pharmacy and therapeutics* [Online], (no pagination). Available: <https://www.cochranelibrary.com/central/doi/10.1002/central/CN-01291557/full>.
- Yamaji, H., Murakami, T., Hina, K., Higashiya, S., Kawamura, H., Murakami, M., et al. (2017). Safety and Efficacy of Underdosing Non-vitamin K Antagonist Oral Anticoagulants in Patients Undergoing Catheter Ablation for Atrial Fibrillation. *J Cardiovasc Pharmacol* 69(2), 118-126. doi: 10.1097/fjc.0000000000000448.
- Yao, X., Shah, N.D., Sangaralingham, L.R., Gersh, B.J., and Noseworthy, P.A. (2017). Non-Vitamin K Antagonist Oral Anticoagulant Dosing in Patients With Atrial Fibrillation and Renal Dysfunction. *J Am Coll Cardiol* 69(23), 2779-2790. doi: 10.1016/j.jacc.2017.03.600.
- Yiginer, O., Tezcan, M., Erdal, E., Degirmencioglu, G., Acar, G., Ergelen, M., et al. (2017). A real-world, retrospective, observational study of dabigatran and rivaroxaban in turkey: Elderly patients receive inappropriately low dose of rivaroxaban. *International Journal of Clinical and Experimental Medicine* 10(7), 10634-10642.
